# Supplementary material for: RNA editing in bacteria recodes multiple proteins and regulates an evolutionarily conserved toxin-antitoxin system
Source: HighWire-hosted journal article supplement (doi:10.1101/gr.222760.117), 2017-09-01
Supplement: Supplemental_Table_S1.xlsx [file Supplemental_Table_S1.xlsx]

## Sheet: Supplemental Table S1
Sample	Position (NC_000913.3)	Gene	Editing form	Editing Level %	Amino acid change	*reference	Coverage per base (Phred quality score > 30)	%A	%C	%G	%T	A.forward	A.reverse	C.forward	C.reverse	G.forward	G.reverse	T.forward	T.reverse
WT1 RNA	16764	hokC	A>I	6.19	Tyr>Cys	T	194	0	6.18557	0	93.8144	0	0	8	4	0	0	109	73
WT1 DNA	16764	hokC	A>I	0	Tyr>Cys	T	238	0	0	0	100	0	0	0	0	0	0	111	127
WT2 RNA	16764	hokC	A>I	9.57	Tyr>Cys	T	209	0	9.56938	0	90.4306	0	0	9	11	0	0	111	78
WT2 DNA	16764	hokC	A>I	0	Tyr>Cys	T	544	0	0	0	100	0	0	0	0	0	0	297	247
tadA_Overexpression	16764	hokC	A>I	16.03	Tyr>Cys	T	262	0	16.0305	0.381679	83.5878	0	0	26	16	0	1	122	97
tadA_mutant	16764	hokC	A>I	1.35	Tyr>Cys	T	148	0	1.35135	0	98.6486	0	0	1	1	0	0	77	69
WT1 RNA	135371	speD	A>I	1.08	Tyr>Cys	T	1484	0.134771	1.07817	0.134771	98.6523	1	1	8	8	0	2	743	721
WT1 DNA	135371	speD	A>I	0	Tyr>Cys	T	225	0	0	0	100	0	0	0	0	0	0	120	105
WT2 RNA	135371	speD	A>I	0.8	Tyr>Cys	T	1003	0	0.797607	0	99.2024	0	0	3	5	0	0	500	495
WT2 DNA	135371	speD	A>I	0	Tyr>Cys	T	503	0	0	0	100	0	0	0	0	0	0	259	244
tadA_Overexpression	135371	speD	A>I	86.31	Tyr>Cys	T	643	0	86.3142	0	13.6858	0	0	275	280	0	0	41	47
tadA_mutant	135371	speD	A>I	0.06	Tyr>Cys	T	1733	0.0577034	0.0577034	0.0577034	99.8269	0	1	0	1	0	1	879	851
WT1 RNA	262906	no ORF1	A>I	32.12	Tyr>Cys	T	495	0	32.1212	0	67.8788	0	0	73	86	0	0	184	152
WT1 DNA	262906	no ORF1	A>I	0	Tyr>Cys	T	162	0	0	0	100	0	0	0	0	0	0	63	99
WT2 RNA	262906	no ORF1	A>I	33.09	Tyr>Cys	T	278	0	33.0935	0	66.9065	0	0	42	50	0	0	90	96
WT2 DNA	262906	no ORF1	A>I	0	Tyr>Cys	T	731	0	0	0	100	0	0	0	0	0	0	335	396
tadA_Overexpression	262906	no ORF1	A>I	43.01	Tyr>Cys	T	558	0	43.0108	0	56.9892	0	0	108	132	0	0	179	139
tadA_mutant	262906	no ORF1	A>I	0	Tyr>Cys	T	220	0	0	0	100	0	0	0	0	0	0	102	118
WT1 RNA	462681	ppiD	A>I	6.05	Tyr>Cys	A	1074	93.9479	0	6.05214	0	474	535	0	0	33	32	0	0
WT1 DNA	462681	ppiD	A>I	0	Tyr>Cys	A	378	100	0	0	0	151	227	0	0	0	0	0	0
WT2 RNA	462681	ppiD	A>I	3.8	Tyr>Cys	A	920	96.1957	0	3.80435	0	380	505	0	0	15	20	0	0
WT2 DNA	462681	ppiD	A>I	0	Tyr>Cys	A	591	100	0	0	0	274	317	0	0	0	0	0	0
tadA_Overexpression	462681	ppiD	A>I	90.16	Tyr>Cys	A	1199	9.84153	0	90.1585	0	54	64	0	0	495	586	0	0
tadA_mutant	462681	ppiD	A>I	0	Tyr>Cys	A	1112	100	0	0	0	499	613	0	0	0	0	0	0
WT1 RNA	607972	hokE	A>I	39.29	Tyr>Cys	A	56	60.7143	0	39.2857	0	17	17	0	0	16	6	0	0
WT1 DNA	607972	hokE	A>I	0	Tyr>Cys	A	465	100	0	0	0	279	186	0	0	0	0	0	0
WT2 RNA	607972	hokE	A>I	44.44	Tyr>Cys	A	27	55.5556	0	44.4444	0	8	7	0	0	7	5	0	0
WT2 DNA	607972	hokE	A>I	0	Tyr>Cys	A	533	100	0	0	0	256	277	0	0	0	0	0	0
tadA_Overexpression	607972	hokE	A>I	84.42	Tyr>Cys	A	77	15.5844	0	84.4156	0	6	6	0	0	46	19	0	0
tadA_mutant	607972	hokE	A>I	0	Tyr>Cys	A	9	100	0	0	0	5	4	0	0	0	0	0	0
WT1 RNA	1390540	mpA	A>I	2.18	Tyr>Cys	T	229	0	2.18341	0	97.8166	0	0	2	3	0	0	96	128
WT1 DNA	1390540	mpA	A>I	0	Tyr>Cys	T	297	0	0	0	100	0	0	0	0	0	0	111	186
WT2 RNA	1390540	mpA	A>I	4.78	Tyr>Cys	T	230	0	4.78261	0	95.2174	0	0	5	6	0	0	90	129
WT2 DNA	1390540	mpA	A>I	0	Tyr>Cys	T	546	0	0	0	100	0	0	0	0	0	0	291	255
tadA_Overexpression	1390540	mpA	A>I	79.66	Tyr>Cys	T	236	0	79.661	0	20.339	0	0	85	103	0	0	24	24
tadA_mutant	1390540	mpA	A>I	0.75	Tyr>Cys	T	266	0	0.75188	0	99.2481	0	0	1	1	0	0	115	149
WT1 RNA	1491986	hokB	A>I	86.95	Tyr>Cys	T	1310	0	86.9466	0	13.0534	0	0	596	543	0	0	71	100
WT1 DNA	1491986	hokB	A>I	0.52	Tyr>Cys	T	191	0	0.52356	0	99.4764	0	0	1	0	0	0	110	80
WT2 RNA	1491986	hokB	A>I	65.57	Tyr>Cys	T	424	0	65.566	0	34.434	0	0	139	139	0	0	58	88
WT2 DNA	1491986	hokB	A>I	0	Tyr>Cys	T	562	0	0	0	100	0	0	0	0	0	0	282	280
tadA_Overexpression	1491986	hokB	A>I	92.39	Tyr>Cys	T	1038	0	92.3892	0	7.61079	0	0	493	466	0	0	31	48
tadA_mutant	1491986	hokB	A>I	1.95	Tyr>Cys	T	308	0	1.94805	0	98.0519	0	0	3	3	0	0	135	167
WT1 RNA	1645135	hokD	A>I	6.33	Tyr>Cys	T	490	0	6.32653	0	93.6735	0	0	18	13	0	0	292	167
WT1 DNA	1645135	hokD	A>I	0	Tyr>Cys	T	201	0	0	0	100	0	0	0	0	0	0	129	72
WT2 RNA	1645135	hokD	A>I	5.49	Tyr>Cys	T	455	0	5.49451	0	94.5055	0	0	16	9	0	0	269	161
WT2 DNA	1645135	hokD	A>I	0	Tyr>Cys	T	674	0	0	0	100	0	0	0	0	0	0	379	295
tadA_Overexpression	1645135	hokD	A>I	21.55	Tyr>Cys	T	682	0	21.5543	0	78.4457	0	0	90	57	0	0	321	214
tadA_mutant	1645135	hokD	A>I	0	Tyr>Cys	T	473	0	0	0	100	0	0	0	0	0	0	293	180
WT1 RNA	2731751	clpB	A>I	3.43	Tyr>Cys	T	1456	0	3.43407	0	96.5659	0	0	29	21	0	0	785	621
WT1 DNA	2731751	clpB	A>I	0	Tyr>Cys	T	246	0	0	0	100	0	0	0	0	0	0	150	96
WT2 RNA	2731751	clpB	A>I	0.9	Tyr>Cys	T	333	0	0.900901	0	99.0991	0	0	1	2	0	0	190	140
WT2 DNA	2731751	clpB	A>I	0	Tyr>Cys	T	550	0	0	0	100	0	0	0	0	0	0	276	274
tadA_Overexpression	2731751	clpB	A>I	71.49	Tyr>Cys	T	2711	0.184434	71.2652	0.0368868	28.5135	3	2	1081	851	1	0	440	333
tadA_mutant	2731751	clpB	A>I	0.09	Tyr>Cys	T	1085	0	0.0921659	0	99.9078	0	0	1	0	0	0	605	479
WT1 RNA	2817826, 2818101, 2818240, 2818515	**tRNA-Arg	A>I	89.3539	Tyr>Cys	T	4086	0	89.3539	0	10.6461	0	0	1914	1737	0	0	263	172
WT1 DNA	2817826, 2818101, 2818240, 2818515	**tRNA-Arg	A>I	0	Tyr>Cys	T	704	0	0	0	100	0	0	0	0	0	0	332	372
WT2 RNA	2817826, 2818101, 2818240, 2818515	**tRNA-Arg	A>I	89.738	Tyr>Cys	T	4122	0.0970403	89.738	0	10.165	3	1	1890	1809	0	0	252	167
WT2 DNA	2817826, 2818101, 2818240, 2818515	**tRNA-Arg	A>I	0	Tyr>Cys	T	1919	0	0	0	100	0	0	0	0	0	0	924	995
tadA_Overexpression	2817826, 2818101, 2818240, 2818515	**tRNA-Arg	A>I	98.0129	Tyr>Cys	T	29238	0.0649839	98.0129	0.0239414	1.89821	13	6	14102	14555	4	3	306	249
tadA_mutant	2817826, 2818101, 2818240, 2818515	**tRNA-Arg	A>I	6.17849	Tyr>Cys	T	3059	0.0980713	6.17849	0	93.7234	1	2	98	91	0	0	1627	1240
WT1 RNA	3206048	ttdR	A>I	19.51	Tyr>Cys	T	164	0	19.5122	0	80.4878	0	0	23	9	0	0	92	40
WT1 DNA	3206048	ttdR	A>I	0	Tyr>Cys	T	357	0	0	0	100	0	0	0	0	0	0	227	130
WT2 RNA	3206048	ttdR	A>I	15.61	Tyr>Cys	T	615	0	15.6098	0	84.3902	0	0	60	36	0	0	361	158
WT2 DNA	3206048	ttdR	A>I	0.16	Tyr>Cys	T	628	0	0.159236	0.159236	99.6815	0	0	0	1	0	1	305	321
tadA_Overexpression	3206048	ttdR	A>I	96.19	Tyr>Cys	T	105	0	96.1905	0	3.80952	0	0	64	37	0	0	2	2
tadA_mutant	3206048	ttdR	A>I	0	Tyr>Cys	T	322	0	0	0	100	0	0	0	0	0	0	226	96
WT1 RNA	3485194	no ORF2	A>I	5.44	Tyr>Cys	T	349	0	5.44413	0	94.5559	0	0	12	7	0	0	170	160
WT1 DNA	3485194	no ORF2	A>I	0	Tyr>Cys	T	283	0	0	0	100	0	0	0	0	0	0	128	155
WT2 RNA	3485194	no ORF2	A>I	2.21	Tyr>Cys	T	181	0	2.20994	0	97.7901	0	0	1	3	0	0	90	87
WT2 DNA	3485194	no ORF2	A>I	0.21	Tyr>Cys	T	473	0	0	0.211416	99.7886	0	0	0	0	0	1	241	231
tadA_Overexpression	3485194	no ORF2	A>I	51.86	Tyr>Cys	T	376	0.265957	51.5957	0	48.1383	0	1	112	82	0	0	93	88
tadA_mutant	3485194	no ORF2	A>I	0	Tyr>Cys	T	174	0	0	0	100	0	0	0	0	0	0	91	83
WT1 RNA	3525884	nudE	A>I	2.01	Tyr>Cys	T	894	0	2.01342	0	97.9866	0	0	10	8	0	0	431	445
WT1 DNA	3525884	nudE	A>I	0	Tyr>Cys	T	249	0	0	0	100	0	0	0	0	0	0	85	164
WT2 RNA	3525884	nudE	A>I	5.11	Tyr>Cys	T	176	0	5.11364	0	94.8864	0	0	4	5	0	0	90	77
WT2 DNA	3525884	nudE	A>I	0	Tyr>Cys	T	602	0	0	0	100	0	0	0	0	0	0	278	324
tadA_Overexpression	3525884	nudE	A>I	69.34	Tyr>Cys	T	1096	0	69.3431	0	30.6569	0	0	366	394	0	0	165	171
tadA_mutant	3525884	nudE	A>I	0	Tyr>Cys	T	165	0	0	0	100	0	0	0	0	0	0	80	85
WT1 RNA	3958244	ilvC	A>I	3.51	Tyr>Cys	A	1626	96.433	0	3.50554	0.0615006	711	857	0	0	27	30	0	1
WT1 DNA	3958244	ilvC	A>I	0	Tyr>Cys	A	378	100	0	0	0	179	199	0	0	0	0	0	0
WT2 RNA	3958244	ilvC	A>I	1.6	Tyr>Cys	A	125	98.4	0	1.6	0	52	71	0	0	1	1	0	0
WT2 DNA	3958244	ilvC	A>I	0	Tyr>Cys	A	596	100	0	0	0	308	288	0	0	0	0	0	0
tadA_Overexpression	3958244	ilvC	A>I	91.07	Tyr>Cys	A	728	8.92857	0	91.0714	0	30	35	0	0	320	343	0	0
tadA_mutant	3958244	ilvC	A>I	0.25	Tyr>Cys	A	403	99.7519	0	0.248139	0	182	220	0	0	0	1	0	0
WT1 RNA	3965663	no ORF3	A>I	8.36	Tyr>Cys	A	311	90.9968	0.321543	8.36013	0.321543	122	161	1	0	16	10	1	0
WT1 DNA	3965663	no ORF3	A>I	0	Tyr>Cys	A	223	100	0	0	0	99	124	0	0	0	0	0	0
WT2 RNA	3965663	no ORF3	A>I	17.65	Tyr>Cys	A	170	81.1765	0	17.6471	1.17647	59	79	0	0	21	9	1	1
WT2 DNA	3965663	no ORF3	A>I	0.15	Tyr>Cys	A	682	99.8534	0.146628	0	0	298	383	1	0	0	0	0	0
tadA_Overexpression	3965663	no ORF3	A>I	41.51	Tyr>Cys	A	265	58.1132	0	41.5094	0.377358	57	97	0	0	70	40	0	1
tadA_mutant	3965663	no ORF3	A>I	0	Tyr>Cys	A	212	100	0	0	0	92	120	0	0	0	0	0	0
WT1 RNA	4022058	tatA	C>U	11.86	Gly>Gly	C	4940	0.0202429	88.1174	0	11.8623	1	0	2174	2179	0	0	282	304
WT1 DNA	4022058	tatA	C>U	0	Gly>Gly	C	281	0	100	0	0	0	0	149	132	0	0	0	0
WT2 RNA	4022058	tatA	C>U	12.85	Gly>Gly	C	3027	0	87.149	0	12.851	0	0	1285	1353	0	0	191	198
WT2 DNA	4022058	tatA	C>U	0	Gly>Gly	C	537	0	100	0	0	0	0	281	256	0	0	0	0
tadA_Overexpression	4022058	tatA	C>U	12.3	Gly>Gly	C	2407	0	87.7025	0	12.2975	0	0	1078	1033	0	0	144	152
tadA_mutant	4022058	tatA	C>U	9.71	Gly>Gly	C	3037	0	90.2206	0.0658545	9.71353	0	0	1342	1398	1	1	143	152
WT1 RNA	4463127	treC	A>I	1.49	Tyr>Cys	T	3211	0.0311429	1.49486	0.0311429	98.4429	0	1	32	16	1	0	2171	990
WT1 DNA	4463127	treC	A>I	0	Tyr>Cys	T	275	0	0	0	100	0	0	0	0	0	0	172	103
WT2 RNA	4463127	treC	A>I	1.16	Tyr>Cys	T	3353	0.0596481	1.16314	0.029824	98.7474	1	1	25	14	1	0	2264	1047
WT2 DNA	4463127	treC	A>I	0	Tyr>Cys	T	498	0	0	0	100	0	0	0	0	0	0	227	271
tadA_Overexpression	4463127	treC	A>I	84.38	Tyr>Cys	T	1569	0	84.385	0	15.615	0	0	916	408	0	0	158	87
tadA_mutant	4463127	treC	A>I	0.02	Tyr>Cys	T	5282	0.0189322	0.0189322	0	99.9621	1	0	1	0	0	0	3674	1606
* if the reference base (column C) is a "T" it means that tadA motif (and the gene/transcript) is on the other strand (compared to the reference), and therefore a T>C will represent A>G substitution
**Data presented for tRNA-Arg includes the following genes (completely identical in sequence): argQ, argZ, argY and argV
