# Supplementary material for: RNA editing in bacteria recodes multiple proteins and regulates an evolutionarily conserved toxin-antitoxin system
Source: HighWire-hosted journal article supplement (doi:10.1101/gr.222760.117), 2017-09-01
Supplement: Supplemental_Table_S2.xlsx [file Supplemental_Table_S2.xlsx]

## Sheet: Supplemental Table S2
Sample	position (NC_000913.3)	Gene	motif	reference	original codon	original amino acid	edited codon	edited amino acid	Coverage per base (Phred quality score > 30)	Editing level %	%A	%C	%G	%T	A.forward	A.reverse	C.forward	C.reverse	G.forward	G.reverse	T.forward	T.reverse
tadA_Overexpression	51311	apaG	TACG	T	TAC	Y	TGC	C	470	72.98	0	72.766	0.212766	27.0213	0	0	177	165	0	1	71	56
tadA_Overexpression	97694	murD	TACG	A	TAC	Y	TGC	C	204	60.29	39.7059	0	60.2941	0	33	48	0	0	67	56	0	0
tadA_Overexpression	106554	No Gene	TACG	A	No Gene	No Gene	No Gene	No Gene	10500	10.33	89.5905	0.0190476	10.3333	0.0571429	5554	3853	2	0	638	447	6	0
tadA_Overexpression	108787	secA	TACG	A	TAC	Y	TGC	C	1254	44.18	55.8214	0	44.1786	0	305	395	0	0	279	275	0	0
tadA_Overexpression	109735	secA	AACG	A	AAC	N	AGC	S	505	30.69	69.3069	0	30.6931	0	187	163	0	0	90	65	0	0
tadA_Overexpression	111712	yacG	AACG	T	AAA	K	AAG	K	385	11.69	0	11.6883	0	88.3117	0	0	19	26	0	0	180	160
tadA_Overexpression	134395	yacL	TACG	A	TAC	Y	TGC	C	498	13.25	86.747	0	13.253	0	258	174	0	0	40	26	0	0
tadA_Overexpression	158348	pcnB	TACG	T	TAC	Y	TGC	C	444	52.7	0	52.7027	0	47.2973	0	0	102	132	0	0	99	111
tadA_Overexpression	163690	hrpB	CACG	A	CAC	H	CGC	R	178	18.54	81.4607	0	18.5393	0	50	95	0	0	15	18	0	0
tadA_Overexpression	164812	mrcB	TACG	A	TAC	Y	TGC	C	362	10.22	89.779	0	10.221	0	165	160	0	0	21	16	0	0
tadA_Overexpression	165442	mrcB	TACG	A	TAC	Y	TGC	C	339	14.45	85.5457	0	14.4543	0	162	128	0	0	24	25	0	0
tadA_Overexpression	165595	mrcB	AACG	A	AAC	N	AGC	S	388	19.59	80.1546	0.257732	19.5876	0	138	173	1	0	36	40	0	0
tadA_Overexpression	173921	hemL	CACG	T	CAC	H	CGC	R	832	42.67	0	42.6683	0	57.3317	0	0	187	168	0	0	285	192
tadA_Overexpression	179722	dgt	TACG	A	TTA	L	TTG	L	113	15.93	84.0708	0	15.9292	0	50	45	0	0	10	8	0	0
tadA_Overexpression	181545	degP	TACG	A	TAC	Y	TGC	C	2002	12.34	87.6623	0	12.3377	0	906	849	0	0	133	114	0	0
tadA_Overexpression	199873	bamA	TACG	A	TAC	Y	TGC	C	3327	32.76	67.2378	0	32.7622	0	1151	1086	0	0	588	502	0	0
tadA_Overexpression	214061	yaeP	TACG	T	TAC	Y	TGC	C	1404	10.47	0	10.4701	0.0712251	89.4587	0	0	68	79	0	1	569	687
tadA_Overexpression	236140	dnaQ	TATG	A	TAT	Y	TGT	C	247	49.39	50.6073	0	49.3927	0	76	49	0	0	78	44	0	0
tadA_Overexpression	239376	No Gene	TACG	T	No Gene	No Gene	No Gene	No Gene	46	34.78	0	34.7826	0	65.2174	0	0	8	8	0	0	15	15
tadA_Overexpression	247696	rayT	TACG	A	TTA	L	TTG	L	86	81.4	18.6047	0	81.3953	0	11	5	0	0	48	22	0	0
tadA_Overexpression	297214	No Gene	TACG	T	No Gene	No Gene	No Gene	No Gene	120	16.67	0	16.6667	0	83.3333	0	0	8	12	0	0	60	40
tadA_Overexpression	303548	yagU	TACG	A	TTA	L	TTG	L	100	24	76	0	24	0	32	44	0	0	12	12	0	0
tadA_Overexpression	331423	betT	TACG	A	TAC	Y	TGC	C	139	15.83	83.4532	0	15.8273	0.719424	30	86	0	0	5	17	0	1
tadA_Overexpression	335543	yahD	TACG	A	CTA	L	CTG	L	43	25.58	74.4186	0	25.5814	0	18	14	0	0	6	5	0	0
tadA_Overexpression	395408	ampH	TACG	T	ACG	T	GCG	A	107	44.86	0	44.8598	0	55.1402	0	0	28	20	0	0	33	26
tadA_Overexpression	410826	mak	TACG	A	TAC	Y	TGC	C	198	14.65	85.3535	0	14.6465	0	88	81	0	0	13	16	0	0
tadA_Overexpression	418345	phoR	TACG	A	ACG	T	GCG	A	64	26.56	73.4375	0	26.5625	0	21	26	0	0	10	7	0	0
tadA_Overexpression	429860	secF	AACG	A	AAC	N	AGC	S	463	39.52	60.4752	0	39.5248	0	107	173	0	0	78	105	0	0
tadA_Overexpression	457655	clpX	TACG	A	TAC	Y	TGC	C	2614	25.36	74.5601	0	25.3634	0.0765111	949	1000	0	0	315	348	1	1
tadA_Overexpression	460659	lon	AACG	A	AAC	N	AGC	S	1118	26.21	73.703	0	26.2075	0.0894454	425	399	0	0	157	136	0	1
tadA_Overexpression	462567	ppiD	TACG	A	TAC	Y	TGC	C	1233	26.28	73.7226	0	26.2774	0	402	507	0	0	164	160	0	0
tadA_Overexpression	465297	queC	TATG	T	TAT	Y	TGT	C	196	13.78	0	13.7755	0	86.2245	0	0	16	11	0	0	108	61
tadA_Overexpression	467899	cof	TACG	A	TAC	Y	TGC	C	60	43.33	56.6667	0	43.3333	0	17	17	0	0	16	10	0	0
tadA_Overexpression	480211	hha	TACG	T	TAC	Y	TGC	C	510	17.06	0	17.0588	0	82.9412	0	0	45	42	0	0	209	214
tadA_Overexpression	489991	No Gene	TACG	A	No Gene	No Gene	No Gene	No Gene	273	13.19	86.8132	0	13.1868	0	130	107	0	0	15	21	0	0
tadA_Overexpression	495289	htpG	TACG	A	TAC	Y	TGC	C	1774	12.97	86.9786	0	12.9651	0.0563698	813	730	0	0	128	102	0	1
tadA_Overexpression	495308	htpG	TACG	A	CTA	L	CTG	L	1940	38.25	61.7526	0	38.2474	0	644	554	0	0	379	363	0	0
tadA_Overexpression	503155	ybaL	TACG	T	CTA	L	CTG	L	538	20.07	0	20.0743	0	79.9257	0	0	51	57	0	0	190	240
tadA_Overexpression	523720	rhsD	TACG	A	ACG	T	GCG	A	34	35.29	64.7059	0	35.2941	0	11	11	0	0	5	7	0	0
tadA_Overexpression	574521	No Gene	TACG	T	No Gene	No Gene	No Gene	No Gene	97	28.87	0	28.866	0	71.134	0	0	19	9	0	0	35	34
tadA_Overexpression	588631	nfrA	TACG	T	TAC	Y	TGC	C	134	19.4	0	19.403	0	80.597	0	0	14	12	0	0	65	43
tadA_Overexpression	588892	nfrA	TACG	T	TAC	Y	TGC	C	176	19.89	0	19.8864	0	80.1136	0	0	20	15	0	0	69	72
tadA_Overexpression	611503	fepA	TACG	T	TAC	Y	TGC	C	60	55	0	55	0	45	0	0	16	17	0	0	13	14
tadA_Overexpression	611875	fepA	GACG	T	GAC	D	GGC	G	97	13.4	0	13.4021	0	86.5979	0	0	7	6	0	0	43	41
tadA_Overexpression	639117	ahpC	TACG	A	TAC	Y	TGC	C	27407	11.31	88.6489	0.0145948	11.3146	0.0218922	10597	13699	0	4	1473	1628	2	4
tadA_Overexpression	641220	ahpF	TACG	A	ACG	T	GCG	A	1816	13.88	86.1233	0	13.8767	0	678	886	0	0	119	133	0	0
tadA_Overexpression	670214	nadD	TACG	T	TAC	Y	TGC	C	347	54.18	0	54.1787	0	45.8213	0	0	93	95	0	0	80	79
tadA_Overexpression	753663	gltA	AACG	T	AAC	N	AGC	S	1546	16.95	0	16.947	0.0646831	82.9884	0	0	133	129	0	1	687	596
tadA_Overexpression	774792	ybgC	TATG	A	TAT	Y	TGT	C	230	36.96	63.0435	0	36.9565	0	97	48	0	0	55	30	0	0
tadA_Overexpression	774846	ybgC	TATG	A	TAT	Y	TGT	C	408	37.01	62.9902	0	37.0098	0	145	112	0	0	81	70	0	0
tadA_Overexpression	783779	pnuC	TACG	A	TAC	Y	TGC	C	103	40.78	59.2233	0	40.7767	0	30	31	0	0	20	22	0	0
tadA_Overexpression	847811	glnH	TACG	T	TAC	Y	TGC	C	624	12.5	0	12.5	0	87.5	0	0	36	42	0	0	267	279
tadA_Overexpression	851465	opgE	TACG	T	TAC	Y	TGC	C	45	51.11	0	51.1111	0	48.8889	0	0	8	15	0	0	11	11
tadA_Overexpression	859811	ybiV	TACG	T	TAC	Y	TGC	C	76	51.32	0	51.3158	0	48.6842	0	0	23	16	0	0	21	16
tadA_Overexpression	878373	bssR	TACG	A	CTA	L	CTG	L	1099	39.76	60.2366	0	39.7634	0	379	283	0	0	243	194	0	0
tadA_Overexpression	902291	artI	TACG	T	TAC	Y	TGC	C	350	20	0	20	0	80	0	0	36	34	0	0	134	146
tadA_Overexpression	903981	ybjP	TACG	T	ACG	T	GCG	A	990	28.38	0	28.3838	0.10101	71.5152	0	0	157	124	0	1	427	281
tadA_Overexpression	927960	cydC	TACG	T	CTA	L	CTG	L	206	13.59	0.485437	13.5922	0	85.9223	1	0	16	12	0	0	92	85
tadA_Overexpression	959733	aroA	TATG	A	ATG	M	GTG	V	218	19.72	80.2752	0	19.7248	0	93	82	0	0	23	20	0	0
tadA_Overexpression	962299	rpsA	TACG	A	TAC	Y	TGC	C	9693	27.23	72.7226	0.0103167	27.2258	0.0412669	3553	3496	0	1	1281	1358	2	2
tadA_Overexpression	977383	mukB	TACG	A	TAC	Y	TGC	C	521	21.31	78.6948	0	21.3052	0	228	182	0	0	61	50	0	0
tadA_Overexpression	983984	ycbL	AACG	A	AAC	N	AGC	S	525	12.19	87.619	0.190476	12.1905	0	185	275	1	0	28	36	0	0
tadA_Overexpression	987420	No Gene	TAAG	A	No Gene	No Gene	No Gene	No Gene	85	23.53	76.4706	0	23.5294	0	32	33	0	0	11	9	0	0
tadA_Overexpression	988559	asnS	TACG	T	ACG	T	GCG	A	1748	16.53	0.0572082	16.5332	0	83.4096	1	0	156	133	0	0	806	652
tadA_Overexpression	1010382	uup	AACG	A	AAC	N	AGC	S	228	14.04	85.9649	0	14.0351	0	116	80	0	0	17	15	0	0
tadA_Overexpression	1020847	sulA	TACG	T	ACG	T	GCG	A	165	20.61	0	20.6061	0	79.3939	0	0	14	20	0	0	64	67
tadA_Overexpression	1023209	yccS	TACG	T	TTA	L	TTG	L	69	17.39	0	17.3913	0	82.6087	0	0	6	6	0	0	23	34
tadA_Overexpression	1023363	yccS	TATG	T	TAT	Y	TGT	C	98	59.18	0	59.1837	0	40.8163	0	0	30	28	0	0	21	19
tadA_Overexpression	1024520	helD	TACG	A	TAC	Y	TGC	C	75	36	64	0	36	0	34	14	0	0	22	5	0	0
tadA_Overexpression	1025829	helD	TACG	A	TTA	L	TTG	L	201	28.86	71.1443	0	28.8557	0	63	80	0	0	33	25	0	0
tadA_Overexpression	1106319	ymdB	TACG	A	TAC	Y	TGC	C	257	81.32	18.677	0	81.323	0	24	24	0	0	100	109	0	0
tadA_Overexpression	1112280	opgH	TATG	A	TAT	Y	TGT	C	615	25.53	74.4715	0	25.5285	0	183	275	0	0	64	93	0	0
tadA_Overexpression	1120579	solA	TACG	T	TAC	Y	TGC	C	190	44.21	0	44.2105	0	55.7895	0	0	25	59	0	0	31	75
tadA_Overexpression	1125037	mdtH	CACG	T	CAC	H	CGC	R	57	19.3	0	19.2982	0	80.7018	0	0	6	5	0	0	26	20
tadA_Overexpression	1144986	rluC	GACG	A	GAC	D	GGC	G	53	37.74	60.3774	1.88679	37.7358	0	19	13	1	0	15	5	0	0
tadA_Overexpression	1146320	yceF	TACG	T	TTA	L	TTG	L	308	14.61	0	14.6104	0	85.3896	0	0	24	21	0	0	136	127
tadA_Overexpression	1153637	pabC	TACG	A	TAC	Y	TGC	C	147	12.93	87.0748	0	12.9252	0	60	68	0	0	11	8	0	0
tadA_Overexpression	1164126	nagZ	TACG	A	TAC	Y	TGC	C	226	44.69	55.3097	0	44.6903	0	72	53	0	0	62	39	0	0
tadA_Overexpression	1166793	ndh	AACG	A	ACG	T	GCG	A	136	11.76	88.2353	0	11.7647	0	61	59	0	0	8	8	0	0
tadA_Overexpression	1173542	mfd	TACG	T	TTA	L	TTG	L	233	45.92	0	45.9227	0	54.0773	0	0	57	50	0	0	67	59
tadA_Overexpression	1178234	lolE	TAAG	A	TTA	L	TTG	L	293	10.24	89.7611	0	10.2389	0	105	158	0	0	15	15	0	0
tadA_Overexpression	1185302	potA	TACG	T	TAC	Y	TGC	C	269	19.33	0.371747	19.3309	0	80.2974	1	0	29	23	0	0	114	102
tadA_Overexpression	1187672	roxA	TACG	T	TAC	Y	TGC	C	542	10.33	0	10.3321	0	89.6679	0	0	33	23	0	0	252	234
tadA_Overexpression	1224646	minD	TACG	T	TAC	Y	TGC	C	1140	10.88	0	10.8772	0	89.1228	0	0	54	70	0	0	514	502
tadA_Overexpression	1235563	fadR	TACG	A	TAC	Y	TGC	C	327	21.41	78.2875	0.30581	21.4067	0	98	158	1	0	29	41	0	0
tadA_Overexpression	1249253	dhaL	TACG	T	ACG	T	GCG	A	210	10.48	0	10.4762	0	89.5238	0	0	11	11	0	0	100	88
tadA_Overexpression	1264110	hemA	TATG	A	ATG	M	GTG	V	287	40.42	59.5819	0	40.4181	0	108	63	0	0	76	40	0	0
tadA_Overexpression	1272991	chaC	TATG	A	TAT	Y	TGT	C	102	17.65	82.3529	0	17.6471	0	40	44	0	0	10	8	0	0
tadA_Overexpression	1300888	No Gene	TAAG	A	No Gene	No Gene	No Gene	No Gene	2407	12.01	87.9103	0.0415455	12.0066	0.0415455	766	1350	0	1	111	178	0	1
tadA_Overexpression	1324837	yciQ	TATG	A	TAT	Y	TGT	C	101	77.23	22.7723	0	77.2277	0	11	12	0	0	36	42	0	0
tadA_Overexpression	1337020	acnA	AACG	A	AAC	N	AGC	S	326	80.06	19.9387	0	80.0613	0	32	33	0	0	135	126	0	0
tadA_Overexpression	1388336	tpx	TACG	T	TAC	Y	TGC	C	2704	82.14	0.0369822	82.0636	0.0369822	17.8624	1	0	1561	658	0	1	291	192
tadA_Overexpression	1395304	ynaI	TACG	T	ACG	T	GCG	A	64	78.12	0	78.125	0	21.875	0	0	23	27	0	0	6	8
tadA_Overexpression	1407661	ydaM	TACG	T	CTA	L	CTG	L	202	17.82	0	17.8218	0	82.1782	0	0	17	19	0	0	94	72
tadA_Overexpression	1420021	racR	AACG	T	AAC	N	AGC	S	337	13.65	0	13.6499	0	86.3501	0	0	28	18	0	0	190	101
tadA_Overexpression	1428482	No Gene	TACG	T	No Gene	No Gene	No Gene	No Gene	49	61.22	0	61.2245	0	38.7755	0	0	18	12	0	0	11	8
tadA_Overexpression	1447682	feaB	AACG	A	AAC	N	AGC	S	43	65.12	34.8837	0	65.1163	0	8	7	0	0	16	12	0	0
tadA_Overexpression	1486146	hrpA	TACG	A	TAC	Y	TGC	C	99	24.24	75.7576	0	24.2424	0	42	33	0	0	12	12	0	0
tadA_Overexpression	1494566	ydcI	TACG	T	TAC	Y	TGC	C	73	31.51	0	31.5068	0	68.4932	0	0	12	11	0	0	24	26
tadA_Overexpression	1516455	patD	TACG	A	TAC	Y	TGC	C	137	10.22	89.781	0	10.219	0	68	55	0	0	9	5	0	0
tadA_Overexpression	1516526	patD	TACG	A	ACG	T	GCG	A	221	11.76	88.2353	0	11.7647	0	103	92	0	0	14	12	0	0
tadA_Overexpression	1523760	yncE	CACG	A	ACG	T	GCG	A	149	33.56	66.443	0	33.557	0	47	52	0	0	26	24	0	0
tadA_Overexpression	1535128	yddE	CACG	T	CAC	H	CGC	R	106	10.38	0	10.3774	0	89.6226	0	0	5	6	0	0	50	45
tadA_Overexpression	1537763	narY	TACG	T	TAC	Y	TGC	C	48	41.67	0	41.6667	0	58.3333	0	0	8	12	0	0	10	18
tadA_Overexpression	1538552	narY	TACG	T	TAC	Y	TGC	C	73	30.14	0	30.137	0	69.863	0	0	9	13	0	0	25	26
tadA_Overexpression	1547702	fdnG	TACG	A	TAC	Y	TGC	C	742	14.29	85.7143	0	14.2857	0	306	330	0	0	53	53	0	0
tadA_Overexpression	1549499	fdnG	TACG	A	TAC	Y	TGC	C	140	20	80	0	20	0	55	57	0	0	13	15	0	0
tadA_Overexpression	1550657	fdnH	TACG	A	TAC	Y	TGC	C	104	43.27	56.7308	0	43.2692	0	28	31	0	0	27	18	0	0
tadA_Overexpression	1553582	adhP	TACG	T	TAC	Y	TGC	C	158	24.05	0	24.0506	0	75.9494	0	0	21	17	0	0	64	56
tadA_Overexpression	1568319	yddW	TACG	T	ACG	T	GCG	A	64	78.12	0	78.125	0	21.875	0	0	25	25	0	0	7	7
tadA_Overexpression	1570546	No Gene	TACG	T	No Gene	No Gene	No Gene	No Gene	69	15.94	0	15.942	0	84.058	0	0	5	6	0	0	33	25
tadA_Overexpression	1607674	tam	TACG	A	TAC	Y	TGC	C	96	21.88	78.125	0	21.875	0	39	36	0	0	12	9	0	0
tadA_Overexpression	1686635	No Gene	AACG	T	No Gene	No Gene	No Gene	No Gene	199	21.61	0	21.608	0	78.392	0	0	22	21	0	0	87	69
tadA_Overexpression	1728033	gloA	TACG	A	TAC	Y	TGC	C	766	24.15	75.718	0.130548	24.1514	0	310	270	0	1	105	80	0	0
tadA_Overexpression	1728158	gloA	TACG	A	ACG	T	GCG	A	758	39.18	60.5541	0.263852	39.1821	0	184	275	1	1	124	173	0	0
tadA_Overexpression	1760759	sufD	TACG	T	ACG	T	GCG	A	144	50.69	0	50.6944	0	49.3056	0	0	34	39	0	0	33	38
tadA_Overexpression	1767490	ydiJ	TATG	T	TAT	Y	TGT	C	130	10.77	0	10.7692	0	89.2308	0	0	6	8	0	0	52	64
tadA_Overexpression	1821946	osmE	TACG	T	TAC	Y	TGC	C	1581	27.7	0	27.704	0	72.296	0	0	295	143	0	0	771	372
tadA_Overexpression	1863705	gapA	TACG	A	TAC	Y	TGC	C	31000	12.08	87.8806	0.0225806	12.0774	0.0193548	9915	17328	1	6	1362	2382	2	4
tadA_Overexpression	1897149	sdaA	AACG	A	AAC	N	AGC	S	709	32.86	67.1368	0	32.8632	0	236	240	0	0	126	107	0	0
tadA_Overexpression	1898217	sdaA	TACG	A	TAC	Y	TGC	C	526	19.77	80.2281	0	19.7719	0	138	284	0	0	35	69	0	0
tadA_Overexpression	1900309	yoaE	GACG	T	GAC	D	GGC	G	116	18.97	0	18.9655	0.862069	80.1724	0	0	10	12	0	1	56	37
tadA_Overexpression	1944117	znuB	TACG	A	TAC	Y	TGC	C	110	18.18	81.8182	0	18.1818	0	45	45	0	0	10	10	0	0
tadA_Overexpression	1992961	uvrC	TACG	T	TTA	L	TTG	L	139	11.51	0	11.5108	0	88.4892	0	0	9	7	0	0	71	52
tadA_Overexpression	1997936	yecS	TACG	T	ACG	T	GCG	A	149	59.73	0	59.7315	0	40.2685	0	0	46	43	0	0	34	26
tadA_Overexpression	2007279	amyA	TACG	A	TAC	Y	TGC	C	466	10.3	89.6996	0	10.3004	0	213	205	0	0	29	19	0	0
tadA_Overexpression	2007801	yedD	TACG	T	TAC	Y	TGC	C	597	10.05	0	10.0503	0	89.9497	0	0	32	28	0	0	301	236
tadA_Overexpression	2056485	amn	TACG	A	TTA	L	TTG	L	341	10.85	89.1496	0	10.8504	0	113	191	0	0	13	24	0	0
tadA_Overexpression	2057173	yeeN	TACG	A	ACG	T	GCG	A	561	39.22	60.7843	0	39.2157	0	140	201	0	0	100	120	0	0
tadA_Overexpression	2063411	cobT	TACG	T	ACG	T	GCG	A	75	14.67	0	14.6667	0	85.3333	0	0	5	6	0	0	36	28
tadA_Overexpression	2073195	flu	CACG	A	ACG	T	GCG	A	147	23.13	76.1905	0.680272	23.1293	0	52	60	1	0	17	17	0	0
tadA_Overexpression	2082802	sbcB	TACG	A	TAC	Y	TGC	C	231	15.58	83.9827	0	15.5844	0.4329	125	69	0	0	24	12	1	0
tadA_Overexpression	2083695	sbcB	TACG	A	ACG	T	GCG	A	160	14.38	85.625	0	14.375	0	65	72	0	0	11	12	0	0
tadA_Overexpression	2093910	hisB	TACG	A	TAC	Y	TGC	C	221	19	80.9955	0	19.0045	0	79	100	0	0	24	18	0	0
tadA_Overexpression	2095992	hisF	TACG	A	TAC	Y	TGC	C	154	38.96	61.039	0	38.961	0	49	45	0	0	31	29	0	0
tadA_Overexpression	2103872	wbbK	TACG	T	TAC	Y	TGC	C	384	21.35	0	21.3542	0	78.6458	0	0	44	38	0	0	178	124
tadA_Overexpression	2148275	yegD	TACG	A	TAC	Y	TGC	C	40	27.5	72.5	0	27.5	0	10	19	0	0	6	5	0	0
tadA_Overexpression	2220440	bglX	CACG	T	CAC	H	CGC	R	94	12.77	0	12.766	0	87.234	0	0	5	7	0	0	45	37
tadA_Overexpression	2221559	bglX	TATG	T	TAT	Y	TGT	C	96	28.12	0	28.125	0	71.875	0	0	15	12	0	0	38	31
tadA_Overexpression	2243692	No Gene	CACG	T	No Gene	No Gene	No Gene	No Gene	648	23.77	0.462963	23.7654	0	75.7716	2	1	55	99	0	0	218	273
tadA_Overexpression	2283151	yejK	TACG	T	TAC	Y	TGC	C	322	50.62	0	50.6211	0	49.3789	0	0	75	88	0	0	77	82
tadA_Overexpression	2300979	napA	TACG	T	TAC	Y	TGC	C	327	55.96	0	55.9633	0	44.0367	0	0	87	96	0	0	70	74
tadA_Overexpression	2302729	napA	TATG	T	ATG	M	GTG	V	1521	36.36	0	36.3577	0	63.6423	0	0	225	328	0	0	395	573
tadA_Overexpression	2346840	nrdA	TACG	A	TAC	Y	TGC	C	432	12.5	87.5	0	12.5	0	223	155	0	0	36	18	0	0
tadA_Overexpression	2415117	pta	TACG	A	TAC	Y	TGC	C	1141	12.53	87.4671	0	12.5329	0	486	512	0	0	73	70	0	0
tadA_Overexpression	2417289	yfcC	AACG	A	AAC	N	AGC	S	63	79.37	20.6349	0	79.3651	0	6	7	0	0	21	29	0	0
tadA_Overexpression	2435494	truA	AACG	T	AAC	N	AGC	S	152	13.16	0	13.1579	0.657895	86.1842	0	0	10	10	0	1	75	56
tadA_Overexpression	2462384	fadL	TACG	A	TAC	Y	TGC	C	464	21.55	78.4483	0	21.5517	0	187	177	0	0	48	52	0	0
tadA_Overexpression	2479572	dsdA	TATG	A	TAT	Y	TGT	C	72	29.17	69.4444	0	29.1667	1.38889	30	20	0	0	12	9	1	0
tadA_Overexpression	2509029	glk	TACG	T	TAC	Y	TGC	C	657	10.5	0	10.5023	0	89.4977	0	0	37	32	0	0	315	273
tadA_Overexpression	2530410	zipA	TACG	T	TAC	Y	TGC	C	665	44.21	0	44.2105	0.150376	55.6391	0	0	140	154	0	1	177	193
tadA_Overexpression	2546230	murQ	TACG	A	TAC	Y	TGC	C	213	14.55	85.446	0	14.554	0	90	92	0	0	15	16	0	0
tadA_Overexpression	2549531	No Gene	TACG	T	No Gene	No Gene	No Gene	No Gene	220	14.55	0	14.5455	0	85.4545	0	0	21	11	0	0	102	86
tadA_Overexpression	2564530	yffS	TACG	A	TAC	Y	TGC	C	104	50.96	49.0385	0	50.9615	0	37	14	0	0	38	15	0	0
tadA_Overexpression	2594988	tmcA	TACG	T	TAC	Y	TGC	C	85	31.76	1.17647	31.7647	0	67.0588	0	1	13	14	0	0	21	36
tadA_Overexpression	2596945	purC	TATG	T	TAT	Y	TGT	C	89	28.09	0	28.0899	0	71.9101	0	0	15	10	0	0	36	28
tadA_Overexpression	2620751	upp	TACG	T	TAC	Y	TGC	C	1489	23.3	0	23.3042	0	76.6958	0	0	182	165	0	0	586	556
tadA_Overexpression	2644247	rlmN	CACG	T	ACG	T	GCG	A	340	13.53	0	13.5294	0	86.4706	0	0	22	24	0	0	149	145
tadA_Overexpression	2705935	lepA	TACG	T	TAC	Y	TGC	C	769	11.7	0.260078	11.7035	0	88.0364	1	1	47	43	0	0	360	317
tadA_Overexpression	2706260	lepA	TAAG	T	AAG	K	GAG	E	745	13.83	0	13.8255	0	86.1745	0	0	48	55	0	0	347	295
tadA_Overexpression	2791925	gabD	AACG	A	AAC	N	AGC	S	308	38.31	61.6883	0	38.3117	0	86	104	0	0	63	55	0	0
tadA_Overexpression	2801424	nrdE	TACG	A	TAC	Y	TGC	C	44	25	75	0	25	0	19	14	0	0	6	5	0	0
tadA_Overexpression	2858381	mutS	AACG	A	AAC	N	AGC	S	236	11.02	88.9831	0	11.0169	0	123	87	0	0	15	11	0	0
tadA_Overexpression	2867077	rpoS	TATG	T	ATG	M	GTG	V	1696	75.47	0	75.4717	0	24.5283	0	0	656	624	0	0	204	212
tadA_Overexpression	2910177	mazG	TACG	T	TAC	Y	TGC	C	208	46.63	0.480769	46.6346	0	52.8846	1	0	53	44	0	0	60	50
tadA_Overexpression	2910564	mazG	TACG	T	TAC	Y	TGC	C	159	84.28	0	84.2767	0	15.7233	0	0	65	69	0	0	15	10
tadA_Overexpression	2944211	csdA	TACG	A	TAC	Y	TGC	C	275	13.82	86.1818	0	13.8182	0	124	113	0	0	19	19	0	0
tadA_Overexpression	2959205	recC	TACG	T	TAC	Y	TGC	C	164	15.24	0	15.2439	0	84.7561	0	0	11	14	0	0	70	69
tadA_Overexpression	2959429	recC	TACG	T	CTA	L	CTG	L	137	37.96	0	37.9562	0	62.0438	0	0	12	40	0	0	30	55
tadA_Overexpression	2965118	thyA	GACG	T	GAC	D	GGC	G	381	17.06	0	17.0604	0.262467	82.6772	0	0	28	37	0	1	154	161
tadA_Overexpression	2975588	aas	TACG	T	ACG	T	GCG	A	89	15.73	0	15.7303	0	84.2697	0	0	5	9	0	0	32	43
tadA_Overexpression	2979247	lysR	TACG	A	TAC	Y	TGC	C	259	10.04	89.5753	0.3861	10.0386	0	127	105	1	0	12	14	0	0
tadA_Overexpression	2979819	No Gene	AACG	T	No Gene	No Gene	No Gene	No Gene	1112	19.78	0	19.7842	0	80.2158	0	0	119	101	0	0	568	324
tadA_Overexpression	2985563	yqeF	TACG	T	TTA	L	TTG	L	303	15.18	0.330033	15.1815	0	84.4884	1	0	5	41	0	0	67	189
tadA_Overexpression	3001487	xdhA	TACG	A	TTA	L	TTG	L	74	20.27	79.7297	0	20.2703	0	32	27	0	0	7	8	0	0
tadA_Overexpression	3006950	ygeW	TACG	A	TAC	Y	TGC	C	39	46.15	53.8462	0	46.1538	0	9	12	0	0	8	10	0	0
tadA_Overexpression	3013717	yqeB	CACG	T	ACG	T	GCG	A	249	75.9	0	75.9036	0	24.0964	0	0	125	64	0	0	38	22
tadA_Overexpression	3049185	gcvH	TACG	T	TAC	Y	TGC	C	2226	49.37	0.0449236	49.3711	0.0449236	50.5391	1	0	555	544	1	0	563	562
tadA_Overexpression	3053969	pepP	TACG	T	TAC	Y	TGC	C	692	44.65	0	44.6532	0	55.3468	0	0	149	160	0	0	191	192
tadA_Overexpression	3091975	gshB	TACG	A	TAC	Y	TGC	C	510	13.92	86.0784	0	13.9216	0	235	204	0	0	39	32	0	0
tadA_Overexpression	3092065	gshB	TACG	A	TAC	Y	TGC	C	661	34.95	64.9017	0.151286	34.947	0	228	201	1	0	126	105	0	0
tadA_Overexpression	3102233	trmI	TACG	T	TAC	Y	TGC	C	979	20.33	0	20.3269	0	79.6731	0	0	91	108	0	0	376	404
tadA_Overexpression	3110161	yqgA	TACG	A	TTA	L	TTG	L	74	17.57	82.4324	0	17.5676	0	24	37	0	0	5	8	0	0
tadA_Overexpression	3115664	sslE	TACG	T	TAC	Y	TGC	C	127	11.02	0	11.0236	0	88.9764	0	0	7	7	0	0	48	65
tadA_Overexpression	3118848	sslE	TACG	T	ACG	T	GCG	A	75	77.33	0	77.3333	0	22.6667	0	0	21	37	0	0	7	10
tadA_Overexpression	3123333	glcB	TACG	T	TAC	Y	TGC	C	928	15.3	0.107759	15.3017	0	84.5905	0	1	69	73	0	0	423	362
tadA_Overexpression	3124849	glcF	AACG	T	AAC	N	AGC	S	331	11.18	0	11.1782	0	88.8218	0	0	18	19	0	0	146	148
tadA_Overexpression	3139226	yghU	TACG	A	TAC	Y	TGC	C	333	22.82	76.8769	0	22.8228	0.3003	105	151	0	0	33	43	1	0
tadA_Overexpression	3165279	parC	TACG	T	TAC	Y	TGC	C	207	30.43	0	30.4348	0	69.5652	0	0	26	37	0	0	67	77
tadA_Overexpression	3171071	qseC	TACG	A	CTA	L	CTG	L	50	76	24	0	76	0	6	6	0	0	19	19	0	0
tadA_Overexpression	3196086	hldE	TACG	T	TAC	Y	TGC	C	284	27.82	0	27.8169	0	72.1831	0	0	39	40	0	0	105	100
tadA_Overexpression	3210893	rpsU	TATG	A	TAT	Y	TGT	C	11277	36.24	63.7315	0.00886761	36.2419	0.0177352	3380	3807	1	0	1979	2108	1	1
tadA_Overexpression	3213489	rpoD	TACG	A	TAC	Y	TGC	C	2570	52.53	47.4708	0	52.4903	0.0389105	638	582	0	0	713	636	0	1
tadA_Overexpression	3220264	patA	TACG	A	GTA	V	GTG	V	204	28.92	71.0784	0	28.9216	0	77	68	0	0	30	29	0	0
tadA_Overexpression	3232941	fadH	TACG	A	TAC	Y	TGC	C	201	22.89	77.1144	0	22.8856	0	76	79	0	0	22	24	0	0
tadA_Overexpression	3276336	garD	TACG	A	TAC	Y	TGC	C	1290	10.62	89.3798	0	10.6202	0	591	562	0	0	85	52	0	0
tadA_Overexpression	3297448	yraQ	TACG	T	ACG	T	GCG	A	87	54.02	0	52.8736	1.14943	45.977	0	0	24	22	1	0	20	20
tadA_Overexpression	3304926	No Gene	AACG	A	No Gene	No Gene	No Gene	No Gene	133	20.3	79.6992	0	20.3008	0	41	65	0	0	13	14	0	0
tadA_Overexpression	3327572	rlmE	TACG	T	TTA	L	TTG	L	1926	10.12	0.0519211	10.1246	0.0519211	89.7715	0	1	97	98	1	0	863	866
tadA_Overexpression	3334404	ispB	AACG	A	AAC	N	AGC	S	771	10.89	88.9754	0.129702	10.8949	0	350	336	0	1	43	41	0	0
tadA_Overexpression	3335299	murA	TACG	T	TAC	Y	TGC	C	632	29.11	0.158228	29.1139	0	70.7278	1	0	117	67	0	0	293	154
tadA_Overexpression	3336467	murA	AACG	T	ACG	T	GCG	A	1104	81.61	0.181159	81.4312	0	18.3877	1	1	436	463	0	0	112	91
tadA_Overexpression	3343720	lptA	TACG	A	TAC	Y	TGC	C	1079	13.53	86.469	0	13.531	0	474	459	0	0	72	74	0	0
tadA_Overexpression	3344230	lptB	TACG	A	TAC	Y	TGC	C	752	58.24	41.7553	0	58.2447	0	145	169	0	0	208	230	0	0
tadA_Overexpression	3362606	No Gene	TACG	T	No Gene	No Gene	No Gene	No Gene	36	38.89	0	38.8889	0	61.1111	0	0	8	6	0	0	12	10
tadA_Overexpression	3369366	yhcH	TACG	T	TAC	Y	TGC	C	380	51.84	0.263158	51.5789	0	48.1579	0	1	107	89	0	0	98	85
tadA_Overexpression	3393535	yhdP	TACG	T	TTA	L	TTG	L	138	54.35	0	54.3478	0	45.6522	0	0	37	38	0	0	30	33
tadA_Overexpression	3439069	zntR	TACG	T	TAC	Y	TGC	C	382	51.05	0	51.0471	0	48.9529	0	0	103	92	0	0	98	89
tadA_Overexpression	3463966	No Gene	TACG	T	No Gene	No Gene	No Gene	No Gene	51	56.86	0	56.8627	0	43.1373	0	0	17	12	0	0	10	12
tadA_Overexpression	3465301	gspM	TACG	A	ACG	T	GCG	A	41	36.59	60.9756	0	36.5854	2.43902	9	16	0	0	6	9	0	1
tadA_Overexpression	3474584	No Gene	TACG	T	No Gene	No Gene	No Gene	No Gene	7428	74.35	0.0269251	74.2999	0.0269251	25.6462	2	0	1213	4306	1	1	582	1323
tadA_Overexpression	3487894	yhfK	TACG	A	CTA	L	CTG	L	87	35.63	63.2184	1.14943	35.6322	0	27	28	1	0	18	13	0	0
tadA_Overexpression	3493709	No Gene	GACG	T	No Gene	No Gene	No Gene	No Gene	138	12.32	0	12.3188	0	87.6812	0	0	9	8	0	0	53	68
tadA_Overexpression	3494216	nirB	TACG	A	TAC	Y	TGC	C	9147	50.89	49.109	0.0109325	50.8363	0.0437302	1778	2714	1	0	1825	2825	2	2
tadA_Overexpression	3516180	damX	TATG	T	TAT	Y	TGT	C	1319	10.54	0	10.5383	0	89.4617	0	0	70	69	0	0	597	583
tadA_Overexpression	3549676	malQ	TACG	T	TAC	Y	TGC	C	355	41.41	0	41.4085	0	58.5915	0	0	76	71	0	0	116	92
tadA_Overexpression	3550399	malP	TACG	T	TAC	Y	TGC	C	384	19.27	0	19.2708	0	80.7292	0	0	35	39	0	0	137	173
tadA_Overexpression	3556959	rtcB	GACG	T	GAC	D	GGC	G	72	29.17	0	29.1667	0	70.8333	0	0	11	10	0	0	24	27
tadA_Overexpression	3560175	glpR_segB	TACG	T	TTA	L	TTG	L	266	11.28	0	11.2782	0	88.7218	0	0	17	13	0	0	115	121
tadA_Overexpression	3563352	glpD	TACG	A	TAC	Y	TGC	C	988	20.75	79.251	0	20.749	0	299	484	0	0	92	113	0	0
tadA_Overexpression	3581178	yhhY	TACG	A	TAC	Y	TGC	C	100	20	80	0	20	0	44	36	0	0	12	8	0	0
tadA_Overexpression	3588435	ugpC	AACG	T	AAC	N	AGC	S	148	20.95	0	20.9459	0.675676	78.3784	0	0	12	19	1	0	64	52
tadA_Overexpression	3592132	ugpB	TACG	T	TAC	Y	TGC	C	82	25.61	0	25.6098	0	74.3902	0	0	11	10	0	0	30	31
tadA_Overexpression	3659647	mdtE	TACG	A	TAC	Y	TGC	C	53	28.3	71.6981	0	28.3019	0	15	23	0	0	5	10	0	0
tadA_Overexpression	3693459	bcsA	TACG	T	TAC	Y	TGC	C	59	67.8	0	67.7966	0	32.2034	0	0	22	18	0	0	8	11
tadA_Overexpression	3722510	glyS	TACG	T	ACG	T	GCG	A	1127	13.66	0.0887311	13.6646	0	86.2467	0	1	60	94	0	0	401	571
tadA_Overexpression	3732977	xylG	TACG	A	TTA	L	TTG	L	153	19.61	80.3922	0	19.6078	0	74	49	0	0	19	11	0	0
tadA_Overexpression	3759509	selB	GACG	T	GAC	D	GGC	G	327	20.18	0	20.1835	0	79.8165	0	0	19	47	0	0	121	140
tadA_Overexpression	3795083	waaF	AACG	A	AAC	N	AGC	S	671	10.58	89.4188	0	10.5812	0	282	318	0	0	41	30	0	0
tadA_Overexpression	3795170	waaF	TACG	A	TAC	Y	TGC	C	746	10.86	89.1421	0	10.8579	0	254	411	0	0	35	46	0	0
tadA_Overexpression	3800690	waaY	TACG	T	GTA	V	GTG	V	143	69.23	0	69.2308	0	30.7692	0	0	28	71	0	0	17	27
tadA_Overexpression	3800721	waaY	TACG	T	TAC	Y	TGC	C	137	29.93	0	29.927	0	70.073	0	0	16	25	0	0	40	56
tadA_Overexpression	3880710	recF	TACG	T	TAC	Y	TGC	C	205	24.88	0	24.878	0	75.122	0	0	25	26	0	0	70	84
tadA_Overexpression	3896741	No Gene	TACG	A	No Gene	No Gene	No Gene	No Gene	82	63.41	36.5854	0	63.4146	0	14	16	0	0	27	25	0	0
tadA_Overexpression	3912896	glmS	TACG	T	TAC	Y	TGC	C	2703	26.71	0	26.7111	0	73.2889	0	0	393	329	0	0	1087	894
tadA_Overexpression	3962127	rep	TATG	A	TAT	Y	TGT	C	179	17.88	82.1229	0	17.8771	0	65	82	0	0	15	17	0	0
tadA_Overexpression	3973293	rffG	TAAG	A	AAG	K	GAG	E	319	12.54	87.4608	0	12.5392	0	127	152	0	0	21	19	0	0
tadA_Overexpression	3978041	wecF	TACG	A	ACG	T	GCG	A	141	14.18	85.8156	0	14.1844	0	70	51	0	0	10	10	0	0
tadA_Overexpression	3980542	wecG	TACG	A	TAC	Y	TGC	C	129	10.85	89.1473	0	10.8527	0	63	52	0	0	9	5	0	0
tadA_Overexpression	3992971	cyaA	TACG	A	ACG	T	GCG	A	453	55.41	44.5916	0	55.4084	0	95	107	0	0	125	126	0	0
tadA_Overexpression	4000631	No Gene	GACG	A	No Gene	No Gene	No Gene	No Gene	46	41.3	58.6957	0	41.3043	0	11	16	0	0	9	10	0	0
tadA_Overexpression	4001937	corA	TACG	A	TAC	Y	TGC	C	536	14.18	85.8209	0	14.1791	0	230	230	0	0	44	32	0	0
tadA_Overexpression	4005262	pldA	TACG	A	TAC	Y	TGC	C	141	26.95	73.0496	0	26.9504	0	60	43	0	0	20	18	0	0
tadA_Overexpression	4013738	metE	TACG	A	TAC	Y	TGC	C	157	30.57	69.4268	0	30.5732	0	47	62	0	0	22	26	0	0
tadA_Overexpression	4020281	ubiB	TACG	A	TAC	Y	TGC	C	747	12.99	86.8809	0.133869	12.9853	0	319	330	1	0	39	58	0	0
tadA_Overexpression	4022155	tatA	TACG	A	ACG	T	GCG	A	2207	15.09	84.8663	0	15.0884	0.0453104	794	1079	0	0	118	215	1	0
tadA_Overexpression	4031822	pepQ	AACG	A	AAC	N	AGC	S	1522	31.67	68.2654	0.065703	31.6689	0	482	557	1	0	233	249	0	0
tadA_Overexpression	4082563	fdoH	TACG	T	TAC	Y	TGC	C	2569	44.06	0	44.0638	0.0389257	55.8972	0	0	619	513	1	0	849	587
tadA_Overexpression	4113988	fpr	TACG	T	TAC	Y	TGC	C	439	15.49	0	15.4897	0	84.5103	0	0	32	36	0	0	185	186
tadA_Overexpression	4150459	No Gene	TACG	A	No Gene	No Gene	No Gene	No Gene	140	13.57	86.4286	0	13.5714	0	76	45	0	0	10	9	0	0
tadA_Overexpression	4151846	ppc	TACG	T	TAC	Y	TGC	C	1055	13.27	0	13.2701	0	86.7299	0	0	69	71	0	0	471	444
tadA_Overexpression	4164912	btuB	TACG	A	TAC	Y	TGC	C	331	16.01	83.9879	0	16.0121	0	150	128	0	0	28	25	0	0
tadA_Overexpression	4180390	rplJ	TACG	A	TAC	Y	TGC	C	20438	29.77	70.1781	0.0244642	29.773	0.0244642	6850	7493	2	3	2951	3134	2	3
tadA_Overexpression	4187301	rpoC	CACG	A	CAC	H	CGC	R	3087	81.99	18.011	0	81.9242	0.0647878	283	273	0	0	1363	1166	1	1
tadA_Overexpression	4195879	thiC	TACG	T	TAC	Y	TGC	C	135	25.93	0	25.9259	0	74.0741	0	0	23	12	0	0	52	48
tadA_Overexpression	4207760	No Gene	TACG	T	No Gene	No Gene	No Gene	No Gene	115	10.43	0	10.4348	0	89.5652	0	0	6	6	0	0	49	54
tadA_Overexpression	4226151	metH	TACG	A	TAC	Y	TGC	C	169	73.96	26.0355	0	73.9645	0	23	21	0	0	62	63	0	0
tadA_Overexpression	4253418	ubiA	TATG	A	ATG	M	GTG	V	161	23.6	76.3975	0	23.6025	0	66	57	0	0	18	20	0	0
tadA_Overexpression	4263591	qorA	TACG	T	TAC	Y	TGC	C	258	28.29	0	28.2946	0	71.7054	0	0	34	39	0	0	88	97
tadA_Overexpression	4295361	gltP	TACG	A	TAC	Y	TGC	C	781	15.24	84.507	0.128041	15.2369	0.128041	313	347	0	1	54	65	0	1
tadA_Overexpression	4326691	yjdM	TACG	T	TAC	Y	TGC	C	253	50.59	0	50.5929	0	49.4071	0	0	59	69	0	0	53	72
tadA_Overexpression	4342599	melA	TATG	A	TAT	Y	TGT	C	1447	15.83	84.105	0	15.8258	0.0691085	472	745	0	0	80	149	0	1
tadA_Overexpression	4351019	dcuS	TACG	T	TAC	Y	TGC	C	96	31.25	0	31.25	0	68.75	0	0	15	15	0	0	40	26
tadA_Overexpression	4357539	cadA	TACG	T	TAC	Y	TGC	C	123	62.6	0	62.6016	0	37.3984	0	0	36	41	0	0	26	20
tadA_Overexpression	4435601	cpdB	TACG	T	TAC	Y	TGC	C	409	30.81	0	30.8068	0	69.1932	0	0	63	63	0	0	148	135
tadA_Overexpression	4443034	tamA	TACG	A	TAC	Y	TGC	C	207	10.14	89.8551	0	10.1449	0	91	95	0	0	13	8	0	0
tadA_Overexpression	4455942	mpl	TACG	A	TAC	Y	TGC	C	593	27.49	72.344	0	27.4874	0.168634	234	195	0	0	86	77	0	1
tadA_Overexpression	4467371	No Gene	TACG	A	No Gene	No Gene	No Gene	No Gene	56	30.36	69.6429	0	30.3571	0	24	15	0	0	12	5	0	0
tadA_Overexpression	4495855	ahr	TATG	T	ATG	M	GTG	V	541	36.23	0	36.2292	0	63.7708	0	0	92	104	0	0	161	184
tadA_Overexpression	4500667	No Gene	TACG	A	No Gene	No Gene	No Gene	No Gene	59	22.03	77.9661	0	22.0339	0	25	21	0	0	7	6	0	0
tadA_Overexpression	4515623	fecA	TACG	T	TAC	Y	TGC	C	95	66.32	0	66.3158	0	33.6842	0	0	29	34	0	0	15	17
tadA_Overexpression	4519685	yjhU	TACG	T	ACG	T	GCG	A	305	14.1	0	14.0984	0	85.9016	0	0	24	19	0	0	135	127
tadA_Overexpression	4522644	yjhG	TACG	T	TAC	Y	TGC	C	93	43.01	0	43.0108	0	56.9892	0	0	20	20	0	0	25	28
tadA_Overexpression	4524489	No Gene	TACG	A	No Gene	No Gene	No Gene	No Gene	87	29.89	70.1149	0	29.8851	0	28	33	0	0	8	18	0	0
tadA_Overexpression	4600440	dnaC	TACG	T	TAC	Y	TGC	C	282	15.96	0	15.9574	0	84.0426	0	0	22	23	0	0	116	121
tadA_Overexpression	4620174	deoB	TACG	A	TAC	Y	TGC	C	1846	11.27	88.7324	0	11.2676	0	857	781	0	0	112	96	0	0
tadA_Overexpression	4631689	slt	TACG	A	GTA	V	GTG	V	221	45.25	54.7511	0	45.2489	0	49	72	0	0	44	56	0	0
tadA_Overexpression	4637406	No Gene	TACG	T	No Gene	No Gene	No Gene	No Gene	76	15.79	0	15.7895	0	84.2105	0	0	6	6	0	0	35	29
* if the reference base (column C) is a "T" it means that tadA motif (and the gene/transcript) is on the other strand (compared to the reference), and therefore a T>C will represent A>G substitution
