# Supplementary material for: RNA editing in bacteria recodes multiple proteins and regulates an evolutionarily conserved toxin-antitoxin system
Source: HighWire-hosted journal article supplement (doi:10.1101/gr.222760.117), 2017-09-01
Supplement: Supplemental_Table_S3.xlsx [file Supplemental_Table_S3.xlsx]

## Sheet: Supplemental Table S3
Amino acid change	TACG population in coding regions	expected proportions	expected when sampling 188 sites	observed (188 sites)	((e-o)^2)/e)
Tyr>Cys	5707	0.453332	85.2265	134	27.9122
Other	6882	0.546668	102.774	54	23.1466
sum	12589	1	188	188	51.0588	Calaculated value
					1	df
					1.3531e-12	Pv
