# Supplementary material for: RNA editing in bacteria recodes multiple proteins and regulates an evolutionarily conserved toxin-antitoxin system
Source: HighWire-hosted journal article supplement (doi:10.1101/gr.222760.117), 2017-09-01
Supplement: Supplemental_Table_S4.xlsx [file Supplemental_Table_S4.xlsx]

## Sheet: Supplemental Table S4
Accssion	Full name	Species	hokB gene sequence	hokB protein sequence	29	46
>NZ_CYUC01000001.1	262691-262840_Achromobacter_sp._ATCC35328_strain_ATCC_35328_whole_genome_shotgun_sequence	Achromobacter sp. ATCC35328	------ATGAAGCACAACCCTCTGGTGGTGTGTCTGCTCATTATCTGCATTACGATTCTGACATTCACACTCCTGACCCGACAAACGCTCTACGAACTGCGGTTCCGGGACGGTGATAAGGAGGTTGCTGCGCTCATGGCCTGCACGTCCAGGTAA------	--MKHNPLVVCLLIICITILTFTLLTRQTLYELRFRDGDKEVAALMACTSR*--	Y	C
>NC_017445.1	2887818-2887973_Erwinia_sp._Ejp617_complete_genome	Erwinia sp. Ejp617	---ATGAAGCCGCAAAGTTCTGTTATCTGGTGCCTTGTTATCGTCTGTCTGACGATACTGGCATTCACACTGTTGACCCGCCATTCGCTTTACGAACTGCGAATACGGGATGGTATCAGGGAGGTTGCGGCAGTTATGGCTTGTGAGTCCAGCCAGTAA---	-MKPQSSVIWCLVIVCLTILAFTLLTRHSLYELRIRDGIREVAAVMACESSQ*-	Y	C
>NC_000913.3	1491922-1492071_Escherichia_coli_str._K-12_substr._MG1655_complete_genome	Escherichia coli	------ATGAAGCACAACCCTCTGGTGGTGTGTCTGCTCATTATCTGCATTACGATTCTGACATTCACACTCCTGACCCGACAAACGCTCTACGAACTGCGGTTCCGGGACGGTGATAAGGAGGTTGCTGCGCTCATGGCCTGCACGTCCAGGTAA------	--MKHNPLVVCLLIICITILTFTLLTRQTLYELRFRDGDKEVAALMACTSR*--	Y	C
>NZ_JH815271.1	1295988-1296137_Escherichia_sp._1_1_43_supercont2.19_whole_genome_shotgun_sequence	Escherichia sp. 1 1 43	------ATGAAACGCAACCCTCTGGTGGTGTGTCTGCTCATTATCTGCATTACGATTCTGACATTCACACTCCTGACCCGACAAACGCTCTACGAACTGCGGTTCCGGGACGGTGATAAGGAGGTTGCTGCGCTCATGGCCTGCACGTCCAGGTAA------	--MKRNPLVVCLLIICITILTFTLLTRQTLYELRFRDGDKEVAALMACTSR*--	Y	C
>NZ_JH660541.1	662730-662879_Escherichia_sp._4_1_40B_supercont2.3_whole_genome_shotgun_sequence	Escherichia sp. 4 1 40B	------ATGAAGCACAACCCTCTGGTGGTGTGTCTGCTCATTATCTGCATTACGATTCTGACATTCACACTCCTGACCCGACAAACGCTCTACGAACTGCGGTTCCGGGACGGTGATAAGGAGGTTGCTGCGCTCATGGCCTGCACGTCCAGGTAA------	--MKHNPLVVCLLIICITILTFTLLTRQTLYELRFRDGDKEVAALMACTSR*--	Y	C
>NZ_KE137316.1	297659-297808_Escherichia_sp._KTE172_acHaD-supercont1.3_whole_genome_shotgun_sequence	Escherichia sp. KTE172	------ATGAAGCGCAACCCTCTGGTGGTGTGTCTGCTCATTATCTGCATTACGATTCTGACATTCACACTCCTGACCCGACAAACGCTCTACGAACTGCGGTTCCGGGACGGTGATAAGGAGGTTGCTGCGCTCATGGCCTGCACGTCCAGGTAA------	--MKRNPLVVCLLIICITILTFTLLTRQTLYELRFRDGDKEVAALMACTSR*--	Y	C
>NZ_FKYV01000010.1	36784-36933_Klebsiella_oxytoca_strain_2880STDY5682666_whole_genome_shotgun_sequence	Klebsiella oxytoca	------ATGAAGCGCAACCCTCTGGTGGTGTGTCTGCTCATTATCTGCATTACGATTCTGACATTCACACTCCTGACCCGACAAACGCTCTACGAACTGCGGTTCCGGGACGGTGATAAGGAGGTTGCTGCGCTCATGGCCTGCACGTCCAGGTAA------	--MKRNPLVVCLLIICITILTFTLLTRQTLYELRFRDGDKEVAALMACTSR*--	Y	C
>NZ_CP011511.1	1687776-1687925_Shigella_boydii_strain_ATCC_9210_complete_genome	Shigella boydii	------ATGAAGCACAACCCTCTGGTGGTGTGTCTGCTCATTATCTGCATTACGATTCTGACATTCACACTCCTGACCCGACAAACGCTCTACGAACTGCGGTTCCGGGACGGTGATAAGGAGGTTGCTGCGCTCATGGCCTGCACGTCCAGGTAA------	--MKHNPLVVCLLIICITILTFTLLTRQTLYELRFRDGDKEVAALMACTSR*--	Y	C
>NZ_AMJS01000070.1	14728-14877_Shigella_dysenteriae_S6554_S6554_71_whole_genome_shotgun_sequence	Shigella dysenteriae	------ATGAAGCACAACCCTCTGGTGGTGTGTCTGCTCATTATCTGCATTACGATTCTGACATTCACACTCCTGACCCGACAAACGCTCTACGAACTGCGGTTCCGGGACGGTGATAAGGAGGTTGCTGCGCTCATGGCCTGCACGTCCAGGTAA------	--MKHNPLVVCLLIICITILTFTLLTRQTLYELRFRDGDKEVAALMACTSR*--	Y	C
>NZ_CM001474.1	1831987-1832136_Shigella_flexneri_5a_str._M90T_chromosome_whole_genome_shotgun_sequence	Shigella flexneri	------ATGAAGCGCAACCCTCTGGTGGTGTGTCTGCTCATTATCTGCATTACGATTCTGGCATTCACACTCCTGACCCGACAAACGCTCTACGAACTGCGGTTCCGGGACGGTGATAAGGAGGTTGCTGCGCTCATGGCCTGCACGTCCAGGTAA------	--MKRNPLVVCLLIICITILAFTLLTRQTLYELRFRDGDKEVAALMACTSR*--	Y	C
>NC_016822.1	1902476-1902625_Shigella_sonnei_53G_main_chromosome_complete_genome	Shigella sonnei	------ATGAAGCACAACCCTCTGGTAGTGTGTCTGCTCATTATCTGCATTACGATTCTGACATTCACACTCCTGACCCGACAAACGCTCTACGAACTGCGGTTCCGGGACGGTGATAAGGAGGTTGCTGCGCTCATGGCCTGCACGTCCAGGTAA------	--MKHNPLVVCLLIICITILTFTLLTRQTLYELRFRDGDKEVAALMACTSR*--	Y	C
>NZ_MDJI01000084.1	652-801_Shigella_sp._FC1172_NODE_176_length_5540_cov_110.483_ID_351_whole_genome_shotgun_sequence	Shigella sp. FC1172	------ATGAAGCGCAACCCTCTGGTGGTGTGTCTGCTCATTATCTGCATTACGATTCTGGCATTCACACTCCTGACCCGACAAACGCTCTACGAACTGCGGTTCCGGGACGGTGATAAGGAGGTTGCTGCGCTCATGGCCTGCACGTCCAGGTAA------	--MKRNPLVVCLLIICITILAFTLLTRQTLYELRFRDGDKEVAALMACTSR*--	Y	C
>NZ_MECT01000023.1	10801-10950_Shigella_sp._FC1544_NODE_120_length_12576_cov_123.317_ID_239_whole_genome_shotgun_sequence	Shigella sp. FC1544	------ATGAAGCACAACCCTCTGGTGGTGTGTCTGCTCATTATCTGCATTACGATTCTGACATTCACACTCCTGACCCGACAAACGCTCTACGAACTGCGGTTCCGGGACGGTGATAAGGAGGTTGCTGCGCTCATGGCCTGCACGTCCAGGTAA------	--MKHNPLVVCLLIICITILTFTLLTRQTLYELRFRDGDKEVAALMACTSR*--	Y	C
>NZ_MIIX01000027.1	10602-10751_Shigella_sp._FC1708_NODE_124_length_12377_cov_38.3268_ID_247_whole_genome_shotgun_sequence	Shigella sp. FC1708	------ATGAAGCACAACCCTCTGGTGGTGTGTCTGCTCATTATCTGCATTACGATTCTGACATTCACACTCCTGACCCGACAAACGCTCTACGAACTGCGGTTCCGGGACGGTGATAAGGAGGTTGCTGCGCTCATGGCCTGCACGTCCAGGTAA------	--MKHNPLVVCLLIICITILTFTLLTRQTLYELRFRDGDKEVAALMACTSR*--	Y	C
>NZ_MDES01000033.1	14394-14543_Shigella_sp._FC2045_NODE_12_whole_genome_shotgun_sequence	Shigella sp. FC2045	------ATGAAGCACAACCCTCTGGTGGTGTGTCTGCTCATTATCTGCATTACGATTCTGACATTCACACTCCTGACCCGACAAACGCTCTACGAACTGCGGTTCCGGGACGGTGATAAGGAGGTTGCTGCGCTCATGGCCTGCACGTCCAGGTAA------	--MKHNPLVVCLLIICITILTFTLLTRQTLYELRFRDGDKEVAALMACTSR*--	Y	C
>NZ_MINR01000042.1	10776-10925_Shigella_sp._FC2175_NODE_138_length_11294_cov_182.145_ID_275_whole_genome_shotgun_sequence	Shigella sp. FC2175	------ATGAAGCACAACCCTCTGGTGGTGTGTCTGCTCATTATCTGCATTACGATTCTGACATTCACACTCCTGACCCGACAAACGCTCTACGAACTGCGGTTCCGGGACGGTGATAAGGAGGTTGCTGCGCTCATGGCCTGCACGTCCAGGTAA------	--MKHNPLVVCLLIICITILTFTLLTRQTLYELRFRDGDKEVAALMACTSR*--	Y	C
>NZ_MINT01000027.1	10633-10782_Shigella_sp._FC2541_NODE_124_length_12408_cov_45.06_ID_247_whole_genome_shotgun_sequence	Shigella sp. FC2541	------ATGAAGCACAACCCTCTGGTGGTGTGTCTGCTCATTATCTGCATTACGATTCTGACATTCACACTCCTGACCCGACAAACGCTCTACGAACTGCGGTTCCGGGACGGTGATAAGGAGGTTGCTGCGCTCATGGCCTGCACGTCCAGGTAA------	--MKHNPLVVCLLIICITILTFTLLTRQTLYELRFRDGDKEVAALMACTSR*--	Y	C
>NZ_MINU01000049.1	261-410_Shigella_sp._FC2710_NODE_144_length_11152_cov_159.767_ID_287_whole_genome_shotgun_sequence	Shigella sp. FC2710	------ATGAAGCACAACCCTCTGGTGGTGTGTCTGCTCATTATCTGCATTACGATTCTGACATTCACACTCCTGACCCGACAAACGCTCTACGAACTGCGGTTCCGGGACGGTGATAAGGAGGTTGCTGCGCTCATGGCCTGCACGTCCAGGTAA------	--MKHNPLVVCLLIICITILTFTLLTRQTLYELRFRDGDKEVAALMACTSR*--	Y	C
>NZ_MDDJ01000066.1	14077-14226_Shigella_sp._FC2928_NODE_15_whole_genome_shotgun_sequence	Shigella sp. FC2928	------ATGAAGCACAACCCTCTGGTGGTGTGTCTGCTCATTATCTGCATTACGATTCTGACATTCACACTCCTGACCCGACAAACGCTCTACGAACTGCGGTTCCGGGACGGTGATAAGGAGGTTGCTGCGCTCATGGCCTGCACGTCCAGGTAA------	--MKHNPLVVCLLIICITILTFTLLTRQTLYELRFRDGDKEVAALMACTSR*--	Y	C
>NZ_CP014768.1	2226111-2226260_Shigella_sp._PAMC_28760_complete_genome	Shigella sp. PAMC 28760	------ATGAAGCACAACCCTCTGGTGGTGTGTCTGCTCATTATCTGCATTACGATTCTGACATTCACACTCCTGACCCGACAAACGCTCTACGAACTGCGGTTCCGGGACGGTGATAAGGAGGTTGCTGCGCTCATGGCCTGCACGTCCAGGTAA------	--MKHNPLVVCLLIICITILTFTLLTRQTLYELRFRDGDKEVAALMACTSR*--	Y	C
>FKKF01000002.1	86114-86272_Klebsiella_pneumoniae_isolate_10271_genome_assembly_contig_KPHVMX_Contig_10_whole_genome_shotgun_sequence	Klebsiella pneumoniae	ATGAAACTGCCACCTAGTAACCTGTTATGGTGTGTATTAATAGTGTGTCTCACACTACTGGCATTTACCTACCTGACCAGAAAATCGCTCTGCGAAATCCGGTACAGGGACACAACCAGGGAGGTGGCGGCTTTTATGGCCTACGAATCCGCTAAGTAG---	MKLPPSNLLWCVLIVCLTLLAFTYLTRKSLCEIRYRDTTREVAAFMAYESAK*-	C	Y
>FMUI01000016.1	45086-45301_Kosakonia_sacchari_strain_CGMCC_1.12102_genome_assembly_contig_IQ20DRAFT_scaffold00015.15_whole_genome_shotgun_sequence	Kosakonia sacchari	ATGAAGCTACCACAAGGAACCCTTATCTGGTGCGTGTTTATCATGTGTTTCACACTGCTGATATTCACTTTTCTGACACGGAAATCGCTGTGCGAAATTCGTTACAAAGATGGGTTCCGCGAGGTCGCGGCTTTCATGGCTTACGAATCCGGTAAGTAG---	MKLPQGTLIWCVFIMCFTLLIFTFLTRKSLCEIRYKDGFREVAAFMAYESGK*-	C	Y
>FQWJ01000026.1	4678-4863_Pantoea_sesami_strain_Si-M154_genome_assembly_contig_Ga0116933_126_whole_genome_shotgun_sequence	Pantoea sesami	ATGAAACTGCCGCGAAACACCCTGCTCTGGTGCGTATTAATAGTGTGTCTCACACTGCTGATATTCACTTACCTGACACGGAAATCGCTCTGCGAAATCCGGTACAGGGACACGGACAGGGAGGTGGCAGCTTTTATGGCTTACGAATCCGCTAAGTAG---	MKLPRNTLLWCVLIVCLTLLIFTYLTRKSLCEIRYRDTDREVAAFMAYESAK*-	C	Y
>FMWJ01000003.1	82175-82390_Photorhabdus_luminescens_strain_ATCC_29999_genome_assembly_contig_Ga0052893_scaffold00003.3_whole_genome_shotgun_sequence	Photorhabdus luminescens	---ATGAAGCCGCAAAAAATCGTAATATTTAGTTTGATCGTTATTTGTGTGACATTACTTCTGTTCACATGGATAACAAGAGGTTCACTCTGTAAACTCCATATCAAACGAGGTAATACCGAGGTTGCGGCAATCATGGCTTACGAATCCAGCGACAGGTAA	-MKPQKIVIFSLIVICVTLLLFTWITRGSLCKLHIKRGNTEVAAIMAYESSDR*	C	Y
>NZ_CP009781.1	1570017-1570169_Yersinia_aldovae_670-83_complete_genome	Yersinia aldovae	------ATGCCACAAAAAACGTTTGTTCTATGCCTATTAATTGTTTGTATAACAGTACTGGCATTTACATTGATTACGCATAAGTCACTGTGTGAATTACGCTTAAAAGATGGAAACAAAGAGGTTGCGGCCATTTTAGCTTACGAATCTGAACGGTAA---	--MPQKTFVLCLLIVCITVLAFTLITHKSLCELRLKDGNKEVAAILAYESER*-	C	Y
>NZ_CHYZ01000010.1	86444-86596_Yersinia_bercovieri_strain_3016/84_whole_genome_shotgun_sequence	Yersinia bercovieri	------ATGCCACAAAATACGTTTGTTTACTGCCTGCTAATTGTTTGTATAACAGTGTTGGCATTTACATTAATAACGCATAAATCACTATGTGAATTACGCCTAAAAGATGGAAACAAAGAGGTTGCGGCCATTTTAGCTTACGAATCTGAACGGTAA---	--MPQNTFVYCLLIVCITVLAFTLITHKSLCELRLKDGNKEVAAILAYESER*-	C	Y
>NC_015224.1	1307813-1307965_Yersinia_enterocolitica_subsp._palearctica_105.5R(r)_complete_genome	Yersinia enterocolitica	------ATGCCACAAAATACGCTTGTTCTATGCCTGTTAATTGTTTGTATAACAGTGCTGGCATTCACATTAATTACGCATAAATCACTGTGTGAGTTACGTGTGAAAAATGGGATCAAGGAGGTTGCGGCCATTTTAGCTTACGAATCTGAACGGTAA---	--MPQNTLVLCLLIVCITVLAFTLITHKSLCELRVKNGIKEVAAILAYESER*-	C	Y
>BAFF01000002.1	19440-19592_Escherichia_hermannii_NBRC_105704_DNA_contig_EH10570402_whole_genome_shotgun_sequence	Atlantibacter hermannii	---ATGAAGCCACTACGCTATCTGTTTGCGTGTTTATTAGTTATTTGCGTAACAGTGCTGTTTTTTTCTTTATTTAATCGCGGTCTGCTTTGCGAATTAAGAATAAAGAACGGAAATCAGGAGGTGGCGGCGAAATTAGCCTGCACTCAACAGTAA------	-MKPLRYLFACLLVICVTVLFFSLFNRGLLCELRIKNGNQEVAAKLACTQQ*--	C	C
>CP012266.1	1017347-1017505_Cronobacter_dublinensis_subsp._dublinensis_LMG_23823_complete_genome	Cronobacter dublinensis	------ATGAAGGACAATACTTTTATCTGGTGCGTTATTATTGTCTGCGTGACGCTATTAATGTTCACCACCCTCTCACGGGAAACGCTTTGCGAGCTGCGCTTGCGGGGCGCGAGCATGGAGGTTGTCGCTTCACTGGCTTGTAAATCCAGAGAGTAA---	--MKDNTFIWCVIIVCVTLLMFTTLSRETLCELRLRGASMEVVASLACKSRE*-	C	C
>NZ_CALD01000014.1	500554-500706_Cronobacter_malonaticus_507_whole_genome_shotgun_sequence	Cronobacter malonaticus	------ATGAAGGACAATACTTTTATTGGGTGCATTATTATTGTTTGTGTGACGGTAATAATGTTCACCATCCTTTCACAGGAAACGCTTTGCGAGCTGCGCTTGCGGGGCGCGGGTATGGAGATTGTCGCTTCACTGGCTTGTAAACCCAGAGAGTAA---	--MKDNTFIGCIIIVCVTVIMFTILSQETLCELRLRGAGMEIVASLACKPRE*-	C	C
>NZ_MSAE01000050.1	17201-17359_Cronobacter_muytjensii_strain_MOD1-Md1s_Md1s_S8_L001_R1_001_trimmed_contig_50_whole_genome_shotgun_sequence	Cronobacter muytjensii	------ATGAAGGACAATACTTTTATCTGGTGCGTTATTATTGTCTGCGTGACGGTATTAATGTTCACCACCTTCTCACGGGAAACGCTTTGCGAGCTGCGCTTGCGGGGCGCGAGCATGGAGGTTGTCGCTTCACTGGCTTGTAAATCCAGAGAGTAA---	--MKDNTFIWCVIIVCVTVLMFTTFSRETLCELRLRGASMEVVASLACKSRE*-	C	C
>NZ_CALF01000071.1	480560-480718_Cronobacter_sakazakii_696_whole_genome_shotgun_sequence	Cronobacter sakazakii	------ATGAAGGACAATACTTTTATCTGGTGCATTATTATTGTTTGTGTGACGGTATTAATGTTCACCACCCTTTCACGGGAAACGCTTTGCGAGCTGCGCTTGCGGGGCGCGGGTATGGAGATTGTCGCTTCACTGGCTTGTAAACCCAGAGAGTAA---	--MKDNTFIWCIIIVCVTVLMFTTLSRETLCELRLRGAGMEIVASLACKPRE*-	C	C
>NC_013282.2	1000614-1000772_Cronobacter_turicensis_z3032_complete_genome	Cronobacter turicensis	------ATGAAGGACAATGCTTTTATCTGGTGCATTATTATTGTTTGCGTGACGGTATTAGTGTTCACCACCCTTTCACGGGAAACGCTTTGCGAGCTACGCTTGCGGGGCGCGAGTATGGAGATTGTCGCTTCACTGGCTTGTAAACCCAGAGAGTAA---	--MKDNAFIWCIIIVCVTVLVFTTLSRETLCELRLRGASMEIVASLACKPRE*-	C	C
>NZ_CP012257.1	1017953-1018111_Cronobacter_universalis_NCTC_9529_complete_genome	Cronobacter universalis	------ATGAAGGACAATACTTTTATCTGGTGCATTATTATTGTTTGTGTGACGGTATTAGTGTTCACCACCCTTTCACGGGAAACGCTTTGCGAGCTGCGCTTGCGGGGCGCGAGTATGGAGGTTGTCGCTTCACTGGCTTGTAAATCCAGAGAGTAA---	--MKDNTFIWCIIIVCVTVLVFTTLSRETLCELRLRGASMEVVASLACKSRE*-	C	C
>FODW01000004.1	129670-129825_Enterobacter_sp._NFIX58_genome_assembly_contig_Ga0059082_scaffold00004.4_whole_genome_shotgun_sequence	Enterobacter sp. NFIX58	---ATGAAACGCCAATCCCCAATTATCCGGGTTTTGATGATTGTTGCTTTGACAATAATCATCTTAACGCTGGTGACGAGGAAAACACTGTGCGAAATCCGTTTTCGAAACGGCTCGCTTGAAGTGACAGCGCGGATGGATTGTCGCTCCGGCCAGTAG---	-MKRQSPIIRVLMIVALTIIILTLVTRKTLCEIRFRNGSLEVTARMDCRSGQ*-	C	C
>FOQN01000003.1	372668-372823_Enterobacter_sp._NFIX59_genome_assembly_contig_Ga0059083_scaffold00003.3_whole_genome_shotgun_sequence	Enterobacter sp. NFIX59	---ATGAAACGCCAAAACCCAGGCATTGGAGTTTTGATGATTATTGCTTTGACAATAATCATCTTAACGCTGGTGACGCGGAAAACACTGTGCGAGATCAGTTTTCGAAACGATTCTTTTGCAGTGACAGCGAGGATGGATTGTCGCTCCGGCCAGTAG---	-MKRQNPGIGVLMIIALTIIILTLVTRKTLCEISFRNDSFAVTARMDCRSGQ*-	C	C
>NZ_JXTQ01000026.1	478038-478190_Klebsiella_mobilis_(Enterobacter_aerogenes_strain_DDE1_c8)_whole_genome_shotgun_sequence	Klebsiella mobilis	---ATGAAGCCACTACGCTATCTGTTTGCGTGTTTATTAGTTATTTGCGTAACAGTGCTGTTTTTTTCTTTATTTAATCGCGGTCTGCTTTGCGAATTAAGAATAAAGAACGGAAATCAGGAGGTGGCGGCGAAATTAGCCTGCACTCAACAGTAA------	-MKPLRYLFACLLVICVTVLFFSLFNRGLLCELRIKNGNQEVAAKLACTQQ*--	C	C
>NC_017910.1	675465-675626_Shimwellia_blattae_DSM_4481___NBRC_105725_complete_genome	Shimwellia blattae	ATGAAATTATCGCAATATTCCGCAGTGTGGTGTCTGTTGATAGTGTGTTTAACGCTGTTACTGCTCACCTTAATTATCCGCCCGCAGTTATGTGAGGTTCGCATAATCCAGGGCGACCGGGAAATCGCGGCAATTATGGCCTGTGGATCCGGCACCTCGTAG	MKLSQYSAVWCLLIVCLTLLLLTLIIRPQLCEVRIIQGDREIAAIMACGSGTS*	C	C
