# Supplementary material for: RNA editing in bacteria recodes multiple proteins and regulates an evolutionarily conserved toxin-antitoxin system
Source: HighWire-hosted journal article supplement (doi:10.1101/gr.222760.117), 2017-09-01
Supplement: Supplemental_Table_S5.xlsx [file Supplemental_Table_S5.xlsx]

## Sheet: Supplemental Table S5
Sample #	SRA accession	Position (FKKF01000002.1)	Editing Level %	*reference	Coverage per base (Phred quality score > 30)	%A	%C	%G	%T	A.forward	A.reverse	C.forward	C.reverse	G.forward	G.reverse	T.forward	T.reverse
1	SRR3218865	86130	1.3	T	3913	0	1.30335	0	98.6967	0	0	51	0	0	0	3678	184
2	SRR3218864	86130	1.72	T	2730	0	1.72161	0	98.2784	0	0	46	1	0	0	2442	241
3	SRR2102990	86130	5.42	T	240	0	5.41667	0	94.5833	0	0	11	2	0	0	217	10
4	SRR2102370	86130	4.19	T	4512	0.0443262	4.18883	0	95.7668	0	2	175	14	0	0	3202	1119
5	SRR2102280	86130	6.25	T	96	0	6.25	0	93.75	0	0	6	0	0	0	86	4
6	SRR2102267	86130	1.75	T	171	0	1.75439	0	98.2456	0	0	3	0	0	0	123	45
7	SRR2101837	86130	3.76	T	213	0	3.75587	0	96.2441	0	0	8	0	0	0	196	9
8	SRR2099908	86130	5.06	T	158	0	5.06329	0	94.9367	0	0	7	1	0	0	137	13
9	SRR2099899	86130	3.76	T	2713	0	3.75968	0	96.2403	0	0	84	18	0	0	1752	859
10	SRR2099879	86130	4.08	T	4873	0	4.08373	0	95.9163	0	0	169	30	0	0	2653	2021
11	SRR2099848	86130	4.74	T	2974	0.0336247	4.74109	0	95.2253	0	1	120	21	0	0	1815	1017
12	SRR2099743	86130	1.55	T	194	0	1.54639	0	98.4536	0	0	3	0	0	0	185	6
13	SRR2099738	86130	3.47	T	202	0	3.46535	0	96.5347	0	0	7	0	0	0	187	8
14	SRR2099723	86130	4.21	T	926	0	4.21166	0	95.7883	0	0	38	1	0	0	656	231
15	SRR2099610	86130	2.1	T	143	0	2.0979	0	97.9021	0	0	2	1	0	0	127	13
16	SRR2099544	86130	4.24	T	165	0	4.24242	0	95.7576	0	0	6	1	0	0	123	35
17	SRR2099491	86130	3.9	T	205	0	3.90244	0	96.0976	0	0	6	2	0	0	152	45
18	SRR2099490	86130	3.75	T	3835	0.0260756	3.75489	0	96.219	0	1	124	20	0	0	2080	1610
19	SRR2098818	86130	3.48	T	5582	0.0358295	3.47546	0	96.4887	0	2	166	28	0	0	3021	2365
20	SRR2098670	86130	5	T	120	0	5	0	95	0	0	3	3	0	0	78	36
21	SRR2098643	86130	3.44	T	5703	0	3.43679	0.0350693	96.5281	0	0	163	33	1	1	3025	2480
22	SRR2098008	86130	2.76	T	145	0	2.75862	0	97.2414	0	0	4	0	0	0	120	21
23	SRR2097725	86130	1.46	T	137	0	1.45985	0	98.5401	0	0	2	0	0	0	120	15
24	SRR2097561	86130	2.5	T	80	0	2.5	0	97.5	0	0	2	0	0	0	69	9
25	ERR576181	86130	1.12	T	268	0	1.1194	0	98.8806	0	0	3	0	0	0	225	40
26	ERR576176	86130	3.8	T	79	0	3.79747	0	96.2025	0	0	3	0	0	0	73	3
27	ERR576165	86130	1.22	T	246	0	1.21951	0	98.7805	0	0	3	0	0	0	208	35
28	ERR576162	86130	1.88	T	637	0	1.88383	0	98.1162	0	0	12	0	0	0	565	60
29	ERR576159	86130	5.88	T	51	0	5.88235	0	94.1176	0	0	2	1	0	0	32	16
30	ERR576150	86130	2.85	T	246	0	2.84553	0	97.1545	0	0	6	1	0	0	209	30
31	ERR576148	86130	1.06	T	377	0	1.06101	0	98.939	0	0	4	0	0	0	287	86
32	ERR576144	86130	3.85	T	156	0	3.84615	0	96.1538	0	0	2	4	0	0	132	18
33	ERR576142	86130	4.17	T	72	0	4.16667	0	95.8333	0	0	3	0	0	0	49	20
34	ERR576133	86130	1.12	T	1248	0	1.12179	0	98.8782	0	0	14	0	0	0	1008	226
35	ERR576132	86130	1	T	400	0	1	0	99	0	0	4	0	0	0	295	101
36	ERR576128	86130	2.14	T	140	0	2.14286	0	97.8571	0	0	2	1	0	0	115	22
37	ERR576126	86130	8.2	T	61	0	8.19672	0	91.8033	0	0	3	2	0	0	34	22
* if the reference base (column C) is a "T" it means that tadA motif (and the gene/transcript) is on the other strand (compared to the reference), and therefore a T>C will represent A>G substitution
