# Supplementary material for: RNA editing in bacteria recodes multiple proteins and regulates an evolutionarily conserved toxin-antitoxin system
Source: HighWire-hosted journal article supplement (doi:10.1101/gr.222760.117), 2017-09-01
Supplement: Supplemental_Table_S6.xlsx [file Supplemental_Table_S6.xlsx]

## Sheet: Supplemental Table S6
Sample #	SRA accession	Position (NC_015224.1)	Editing Level %	reference	Coverage per base (Phred quality score > 30)	%A	%C	%G	%T	A.forward	A.reverse	C.forward	C.reverse	G.forward	G.reverse	T.forward	T.reverse
1	SRR1618830	1307949	20.51	A	273	79.4872	0	20.5128	0	72	145	0	0	11	45	0	0
2	SRR1618831	1307949	18.2879	A	257	81.323	0	18.2879	0.389105	79	130	0	0	5	42	1	0
3	SRR1618832	1307949	16.6667	A	252	83.3333	0	16.6667	0	44	166	0	0	13	29	0	0
4	SRR1618833	1307949	19.6	A	449	79.7327	0.668151	19.5991	0	67	291	1	2	30	58	0	0
5	SRR1618834	1307949	20.08	A	797	79.9247	0	20.0753	0	154	483	0	0	25	135	0	0
6	SRR1618835	1307949	20.2	A	688	79.6512	0	20.2035	0.145349	133	415	0	0	32	107	1	0
7	SRR1618836	1307949	13.78	A	653	86.0643	0.153139	13.7825	0	101	461	0	1	13	77	0	0
8	SRR1618837	1307949	17.95	A	2139	82.0009	0.0467508	17.9523	0	353	1401	0	1	69	315	0	0
9	SRR1826151	1307949	15.82	A	531	83.9925	0.188324	15.8192	0	126	320	0	1	20	64	0	0
10	SRR1826152	1307949	8.76	A	491	91.2424	0	8.75764	0	117	331	0	0	15	28	0	0
11	SRR1826153	1307949	19.18	A	438	80.5936	0.228311	19.1781	0	62	291	0	1	25	59	0	0
12	SRR1826154	1307949	17.17	A	99	82.8283	0	17.1717	0	22	60	0	0	6	11	0	0
13	SRR1826155	1307949	19.7232	A	289	80.2768	0	19.7232	0	76	156	0	0	12	45	0	0
14	SRR1826156	1307949	18.15	A	248	81.4516	0	18.1452	0.403226	75	127	0	0	5	40	1	0
15	SRR1826157	1307949	15.29	A	242	84.7107	0	15.2893	0	44	161	0	0	12	25	0	0
16	SRR1826158	1307949	19.6	A	449	79.7327	0.668151	19.5991	0	67	291	1	2	30	58	0	0
17	SRR1826159	1307949	6.55	A	229	93.4498	0	6.55022	0	86	128	0	0	3	12	0	0
18	SRR1826160	1307949	3.42	A	146	96.5753	0	3.42466	0	88	53	0	0	1	4	0	0
19	SRR1826161	1307949	22.56	A	922	77.2234	0	22.5597	0.21692	123	589	0	0	8	200	0	2
20	SRR1826162	1307949	30.22	A	1029	69.7765	0	30.2235	0	112	606	0	0	83	228	0	0
21	SRR1826163	1307949	14.31	A	489	85.6851	0	14.3149	0	78	341	0	0	12	58	0	0
22	SRR1826164	1307949	21.87	A	695	78.1295	0	21.8705	0	90	453	0	0	23	129	0	0
23	SRR3110970	1307949	6.7	A	224	93.3036	0	6.69643	0	84	125	0	0	3	12	0	0
24	SRR3110971	1307949	3.68	A	136	96.3235	0	3.67647	0	84	47	0	0	1	4	0	0
25	SRR3110972	1307949	9.80392	A	153	90.1961	0	9.80392	0	90	48	0	0	8	7	0	0
26	SRR3110973	1307949	7.95	A	151	92.053	0	7.94702	0	88	51	0	0	3	9	0	0
27	SRR3110974	1307949	10.82	A	194	89.1753	0	10.8247	0	81	92	0	0	16	5	0	0
28	SRR3110975	1307949	8.59	A	163	90.7975	0.613497	8.58896	0	82	66	1	0	5	9	0	0
29	SRR3110976	1307949	6.36	A	110	93.6364	0	6.36364	0	53	50	0	0	3	4	0	0
30	SRR3110977	1307949	11.05	A	190	88.9474	0	11.0526	0	69	100	0	0	5	16	0	0
31	SRR3110978	1307949	14.39	A	139	85.6115	0	14.3885	0	63	56	0	0	5	15	0	0
32	SRR3110979	1307949	9.74	A	154	90.2597	0	9.74026	0	63	76	0	0	11	4	0	0
