# Supplementary material for: RNA editing in bacteria recodes multiple proteins and regulates an evolutionarily conserved toxin-antitoxin system
Source: HighWire-hosted journal article supplement (doi:10.1101/gr.222760.117), 2017-09-01
Supplement: Supplemental_Table_S7.xlsx [file Supplemental_Table_S7.xlsx]

## Sheet: Supplemental Table S7
Sample	Position (NC_000913.3)	reference	Coverage per base (Phred quality score > 30)	Editing level %	%A	%C	%G	%T	A.forward	A.reverse	C.forward	C.reverse	G.forward	G.reverse	T.forward	T.reverse
MG1655-EcM2.1, OD=0.2 (1:45h)	1491986	T	393137	27.83	0.011192	27.8264	0.00279801	72.1596	22	22	46423	62973	1	10	135533	148153
MG1655-EcM2.1, OD=0.8 (3:30h)	1491986	T	449830	40.18	0.00889225	40.1794	0.00222306	59.8095	16	24	76029	104710	1	9	128042	140999
MG1655-EcM2.1, OD=1.6 (5:30h)	1491986	T	334266	79.51	0.0125648	79.4912	0.0023933	20.4939	18	24	112079	153633	2	6	32656	35848
MG1655-EcM2.1, OD>1.9 (9h)	1491986	T	241585	93.04	0.0111762	93.0227	0.0037254	6.96235	8	19	93948	130781	3	6	8006	8814
MG1655-EcM2.1, hokB WT, OD>1.9 (24 h)	1491986	T	424555	63.99	0.0141324	63.9726	0.00329757	36.0099	30	30	113067	158532	4	10	72775	80107
MG1655-EcM2.1, hokB mutant, T1491986C, Tyr29(TAC)>Cys29(TGC)	1491986	T	426243	99.9	0.0100881	99.8879	0.0030499	0.0990046	20	23	177843	247922	5	8	198	224
MG1655-EcM2.1, hokB mutant, G1491985A, Tyr29(TAC)>Tys29(TAT)	1491986	T	354634	0.5	0.00874141	0.499388	0	99.4919	12	19	761	1010	0	0	167339	185493
* if the reference base (column C) is a "T" it means that tadA motif (and the gene/transcript) is on the other strand (compared to the reference), and therefore a T>C will represent A>G substitution
