# Supplementary material for: RNA editing in bacteria recodes multiple proteins and regulates an evolutionarily conserved toxin-antitoxin system
Source: HighWire-hosted journal article supplement (doi:10.1101/gr.222760.117), 2017-09-01
Supplement: Supplemental_Table_S8.xlsx [file Supplemental_Table_S8.xlsx]

## Sheet: Supplemental Table S8
Primer	Gene	Sequence	5’start position (NC_000913.3)	Notes
1	hokB	ACGACGCTCTTCCGATCTACACTCCTGACCCGACAAAC	1492011	In bold, the primer region matching hokB sequence. Underlined, the primer tail matching Illumina’s adapters.
2	hokB	AGACGTGTGCTCTTCCGATCTTTACCTGGACGTGCAGGCC	1491922	In bold, the primer region matching hokB sequence. Underlined, the primer tail matching Illumina’s adapters.
3	tadA	CCGATTGGTCGCCATGAG	2697716
4	tadA	CCGATTGGTCGCCATGAT	2697716
5	tadA	TTAATCCGTCGAGGATTGCGC	2697354
6	tadA	ATGCGCCGCGCTTTTATAACC	2697890
7	hokB	GACCCGACAAACGCTCTG	1492003
8	hokB	TGACCCGACAAACGCTCTA	1492004
9	hokB	GACCCGACAAACGCTCTAT	1492003
10	hokB	GACCCGACAAACGCTCTAC	1492003
11	hokB	TTCCTTTTATGCCGATGCCG	1491718
12	hokB	CGAAAAATTCTGGAAAACAGC	1492275
13	hokB	GCGAACTGCGGTTCCGGGACG	1491986
14	hokB	AGAGCGTTTGTCGGGTCAGG	1491987
15	hokB	TGAACTGCGGTTCCGGGACGG	1491985
16	hokB	TAGAGCGTTTGTCGGGTCAG	1491986
17	tadA	CCGGATCAGGTTCCGGCTCTCGCCGCGCTTTTATAACCGG	2697887
18	tadA	AGCTGGAGACCGTTTAAACTTAATCCGTCGAGGATTGCGC	2697354
19	pBAD-plasmid	GCAATCCTCGACGGATTAAGTTTAAACGGTCTCCAGCTTG	-
20	pBAD-plasmid	TCCGGTTATAAAAGCGCGGCGAGAGCCGGAACCTGATCCG	-
21	hokB	TTCAGATCTTAGCCTCTTACC	1492116
22	hokB	ATGAATCTGCTAGTCAAATGCG	1491876
