# Supplementary material for: RNA editing in bacteria recodes multiple proteins and regulates an evolutionarily conserved toxin-antitoxin system
Source: HighWire-hosted journal article supplement (doi:10.1101/gr.222760.117), 2017-09-01
Supplement: Supplemental_Table_S9.xlsx [file Supplemental_Table_S9.xlsx]

## Sheet: Supplemental Table S9
PCR	Primers	Reaction mix	Initial denaturation step	Denaturation	Anealing	Elongation	Final elongation step	Cycles
1	1&2	5 pmol of forward and reverse primers (1µl), 10µl of HiProof 2X mix (Bio-Rad). 1µl of cDNA or DNA template was used. DDW was added to a final 20 µl reaction volume.	98°C for 180 seconds	98°C for 10 seconds	65°C for 10 seconds	72°C for 7 seconds	72°C for 60 seconds	35
2	Illumina adapters				67°C for 10 seconds	72°C for 8 seconds		15
3	3&4&5				67°C for 10 seconds	72°C for 15 seconds		35
4	5&6				69°C for 10 seconds	72°C for 10 seconds		35
5	7&11 or 8&11 or 9&11 or 10&11	5 pmol of forward and reverse primers (1µl), 10µl of redTaq 2X mix (Bio-Rad). 1µl of cDNA or DNA template was used. DDW was added to a final 20 µl reaction volume.	94°C for 300 seconds	94°C for 60 seconds	66°C for 60 seconds	72°C for 30 seconds		35
								35
6	12&11					72°C for 60 seconds		35
7	13&14	5 pmol of forward and reverse primers (1µl), 10µl of HiProof 2X mix (Bio-Rad). 1µl of cDNA or DNA template was used. DDW was added to a final 20 µl reaction volume.	98°C for 180 seconds	98°C for 10 seconds	67°C for 10 seconds	72°C for 150 seconds		35
8	15&16				67°C for 10 seconds	72°C for 150 seconds		35
9	17&18				70°C for 10 seconds	72°C for 15 seconds		35
10	19&20				70°C for 10 seconds	72°C for 150 seconds		35
11	21&22				64°C for 10 seconds	72°C for 10 seconds		35
