# Supplementary material for: RNA editing in bacteria recodes multiple proteins and regulates an evolutionarily conserved toxin-antitoxin system
Source: HighWire-hosted journal article supplement (doi:10.1101/gr.222760.117), 2017-09-01
Supplement: Supplemental_Table_S10.xlsx [file Supplemental_Table_S10.xlsx]

## Sheet: Supplemental Table S10
Gene/Genomic coordinates	BLASTed against	Alignment length	Percent identity	Hit start site	Hit end site	Alignment length	Mismatch(s)	evalue
clpB	NC_000913.3	101	100	2731701	2731801	101	0	1e-48
hokB	NC_000913.3	101	100	1491936	1492036	101	0	1e-48
hokC	NC_000913.3	101	100	16714	16814	101	0	1e-48
hokD	NC_000913.3	101	100	1645085	1645185	101	0	1e-48
hokE	NC_000913.3	101	100	607922	608022	101	0	1e-48
ilvC	NC_000913.3	101	100	3958194	3958294	101	0	1e-48
mpaA	NC_000913.3	101	100	1390490	1390590	101	0	1e-48
nudE	NC_000913.3	101	100	3525834	3525934	101	0	1e-48
ppiD	NC_000913.3	101	100	462631	462731	101	0	1e-48
3485194	NC_000913.3	101	100	3485144	3485244	101	0	1e-48
speD	NC_000913.3	101	100	135321	135421	101	0	1e-48
tatA	NC_000913.3	101	100	4022008	4022108	101	0	1e-48
262906	NC_000913.3	101	100	262856	262956	101	0	1e-48
262906	NC_000913.3	101	100	297206	297264	59	0	3e-25
treC	NC_000913.3	101	100	4463077	4463177	101	0	1e-48
tRNA_Arg	NC_000913.3	101	100	2818465	2818565	101	0	1e-48
tRNA_Arg	NC_000913.3	101	100	2817778	2817861	84	0	3e-39
tRNA_Arg	NC_000913.3	101	100	2818053	2818136	84	0	3e-39
tRNA_Arg	NC_000913.3	101	100	2818197	2818275	79	0	2e-36
3965663	NC_000913.3	101	100	3965613	3965713	101	0	1e-48
ttdR	NC_000913.3	101	100	3205998	3206098	101	0	1e-48
