# Supplementary material for: RNA editing in bacteria recodes multiple proteins and regulates an evolutionarily conserved toxin-antitoxin system
Source: HighWire-hosted journal article supplement (doi:10.1101/gr.222760.117), 2017-09-01
Supplement: Supplemental_Table_S11.xlsx [file Supplemental_Table_S11.xlsx]

## Sheet: Supplemental Table S11
Accssion and Species information	16S rRNA sequence
>JN175345.1 Atlantibacter hermannii strain CIP 103176 16S ribosomal RNA gene, complete sequence	----------------------------------------------------ACATGCAAGTCGAACGGTAACAGGAAGCAGCTTGCTGCTTCGCTGACGAGTGGCGGACGGGTGAGTAATGTCTGGGGATCTGCCTGATGGAGGGGGATAACTACTGGAAACGGTAGCTAATACCGCATAACGTCGCAAGACCAAAGAGGGGGACCT--TCGGGCCTCTTGCCATCAGATGAACCCAGATGGGATTAGCTAGTA
>NC_000913.3:223771-225312 Escherichia coli str. K-12 substr. MG1655, complete genome	AAATTGAAGAGTTTGATCATGGCTCAGATTGAACGCTGGCGGCAGGCCTAACACATGCAAGTCGAACGGTAACAGGAAGAAGCTTGCTTCTTTGCTGACGAGTGGCGGACGGGTGAGTAATGTCTGGGAAACTGCCTGATGGAGGGGGATAACTACTGGAAACGGTAGCTAATACCGCATAACGTCGCAAGACCAAAGAGGGGGACCT--TCGGGCCTCTTGCCATCGGATGTGCCCAGATGGGATTAGCTAGTAGGTGGGGTAACGGCTCACCTAGGCGACGATCCCTAGCTGGTCTGAGAGGATGACCAGCCACACTGGAACTGAGACACGGTCCAGACTCCTACGGGAGGCAGCAGTGGGGAATATTGCACAATGGGCGCAAGCCTGATGCAGCCA…
>NR_026332.1 Shigella dysenteriae strain ATCC 13313 16S ribosomal RNA gene, partial sequence	-------------------TGGCTCAGATTGAACGCTGGCGGCAGGCCTAACACATGCAAGTCGAACGGTAACAGAAAGCAGCTTGC-TGTTTGCTGACGAGTGGCGGACGGGTGAGTAATGTCTGGGAAACTGCCTGATGGAGGGGGATAACTACTGGAAACGGTAGCTAATACCGCATAACGTCGCAAGACCAAAGAGGGGGACCT--TCGGGCCTCTTGCCATCGGATGTGCCCAGATGGGATTAGCTAGTA
>NR_102794.1 Enterobacter cloacae strain ATCC 13047 16S ribosomal RNA gene, complete sequence	AAATTGAAGAGTTTGATCATGGCTCAGATTGAACGCTGGCGGCAGGCCTAACACATGCAAGTCGAACGGTAGCACAGAG-AGCTTGC-TCTCGGGTGACGAGTGGCGGACGGGTGAGTAATGTCTGGGAAACTGCCTGATGGAGGGGGATAACTACTGGAAACGGTAGCTAATACCGCATAATGTCGCAAGACCAAAGAGGGGGACCT--TCGGGCCTCTTGCCATCAGATGTGCCCAGATGGGATTAGCTAGTAGGTGGGGTAACGGCTCACCTAGGCGACGATCCCTAGCTGGTCTGAGAGGATGACCAGCCACACTGGAACTGAGACACGGTCCAGACTCCTACGGGAGGCAGCAGTGGGGAATATTGCACAATGGGCGCAAGCCTGATGCAGCCA…
>NR_036794.1 Klebsiella pneumoniae strain DSM 30104 16S ribosomal RNA gene, complete sequence	-------AGAGTTTGATNNTGGCTCAGATTGAACGCTGGCGGCAGGCCTAACACATGCAAGTCGAGCGGTAGCACAGAG-AGCTTGC-TCTCGGGTGACGAGCGGCGGACGGGTGAGTAATGTCTGGGAAACTGCCTGATGGAGGGGGATAACTACTGGAAACGGTAGCTAATACCGCATAACGTCGCAAGACCAAAGTGGGGGACCT--TCGGGCCTCATGCCATCAGATGTGCCCAGATGGGATTAGCTAGTA
>NR_117704.1 Kosakonia radicincitans strain DSM 16656 16S ribosomal RNA gene, partial sequence	----------GTTTGATCTTGGCTCAGATTGAACGCTGGCGGCAGGCCTAACACATGCAAGTCGAACGGTAGCACAGAG-AGCTTGC-TCTCGGGTGACGAGTGGCGGACGGGTGAGTAATGTCTGGGAAACTGCCTGATGGAGGGGGATAACTACTGGAAACGGTAGCTAATACCGCATAACGTCGCAAGACCAAAGAGGGGGACCT--TCGGGCCTCTTGCCATCAGATGTGCCCAGATGGGATTAGCTAGTA
>NR_074908.1 Shimwellia blattae strain DSM 4481 16S ribosomal RNA gene, complete sequence	-AATTGAAGAGTTTGATCATGGCTCAGATTGAACGCTGGCGGCAGGCTTAACACATGCAAGTCGAACGGTAACAGAAATCAGCTTGCTGATTTGCTGACGAGTGGCGGACGGGTGAGTAATGTCTGGGAAACTGCCTGATGGAGGGGGATAACTACTGGAAACGGTAGCTAATACCGCATAATGTCGCAAGACCAAAGTGGGGGACCT--TCGGGCCTCATACCATCGGATGTGCCCAGATGGGATTAGCTAGTA
>NR_044060.1 Cronobacter malonaticus strain E825 16S ribosomal RNA gene, partial sequence	--------------------------------------------------ACACATGC-AGTCGAACGGTAACAGGGAGCAGCTTGCTGCTCNGCTGACGAGTGGCGGACGGGTGAGTAATGTCTGGGAAACTGCCTGATGGAGGGGGATAACTACTGGAAACGGTAGCTAATACCGCATAACGTCTTCGGACCAAAGTGGGGGACCT--TCGGGCCTCATGCCATCAGATGTGCCCAGATGGGATTAGCTAGTA
>NR_104928.1 Pantoea stewartii subsp. indologenes strain CIP 104006 16S ribosomal RNA gene, complete sequence	----------GTTTGATCATGGCTCAGATTGAACGCTGGCGGCAGGCCTAACACATGCAAGTCGGACGGTAGCACAGAGGAGCTTGCTCCTCGGGTGACGAGTGGCGGACGGGTGAGTAATGTCTGGGAAACTGCCCGATGGAGGGGGATAACTACTGGAAACGGTAGCTAATACCGCATAACGTCGCAAGACCAAAGTGGGGGACCT--TCGGGCCTCACACCATCGGATGTGCCCAGATGGGATTAGCTTGTA
>NR_041970.1 Erwinia amylovora strain DSM 30165 16S ribosomal RNA gene, partial sequence	--------------------GGCTCAGATTGAACGCTGGCGGCAGGCCTAACACATGCAAGTCGAACGGTAGCACAGAG-AGCTTGC-TCTTGGGTGACGAGTGGCGGACGGGTGAGTAATGTCTGGGAAACTGCCCGATGGAGGGGGATAACTACTGGAAACGGTAGCTAATACCGCATAACGTCTACGGACCAAAGTGGGGGACCT--TCGGGCCTCACACCATCGGATGTGCCCAGATGGGATTAGCTGGTA
>NR_116786.1 Yersinia enterocolitica subsp. palearctica strain DSM 13030 16S ribosomal RNA gene, partial sequence	--------------------------------------GCGGCAGGCCTAACACATGCAAGTCGAGCGGCAGCGGGAAGTAGTTTACTACTTTGCCGGCGAGCGGCGGACGGGTGAGTAATGTCTGGGAAACTGCCTGATGGAGGGGGATAACTACTGGAAACGGTAGCTAATACCGCATAACGTCTTCGGACCAAAGTGGGGGACCT--TCGGGCCTCACGCCATCGGATGTGCCCAGATGGGATTAGCTAGTA
>NR_029011.1 Photorhabdus luminescens subsp. kayaii strain 1121 16S ribosomal RNA gene, complete sequence	-----------------CCTGGCTCAGATTGAACGCTGGCGGCAGGCCTAACACATGCAAGTCGAGCGGTAACAGGAAAGTGCTTGCGCTTTTGCTGACGAGCGGCGGACGGGTGAGTAATGTCTGGGGATCTGCCCGAGGGCGGGGGATAACCACTGGAAACGGTGGCTAATACCGCATAATGTCGCGAGACCAAAGTGGGGGACCTGAAAGGGCCTCACGCCATCGGATGAACCCAGATGGGATTAGCTAGTA
>NR_042021.1 Achromobacter denitrificans strain DSM 30026 16S ribosomal RNA gene, complete sequence	-------AGAGTTTGATCATGGCTCAGATTGAACGCTAGCGGGATGCCTTACACATGCAAGTCGAACGGCAGCACGGA------CTTCGGTCTGGTGGCGAGTGGCGAACGGGTGAGTAATGTATCGGAACGTGCCCAGTAGCGGGGGATAACTACGCGAAGGCGTAGCTAATACCGCATACGCCCTACGGGGGAAAGCAGGGGATCG--CAAGACCTTGCACTATTGGAGCGGCCGATATCGGATTAGCTAGTT
